# Supplementary material for: Differentiation of adsorption and degradation in steroid hormone micropollutants removal using electrochemical carbon nanotube membrane
Source: PubMed Central journal article supplement (PMC11535516; doi:10.1038/s41467-024-52730-7), 2024-11-04
Supplement: 41467_2024_52730_MOESM1_ESM.pdf [file 41467_2024_52730_MOESM1_ESM.pdf]

1  
2  
3  
4  
5  
6  
7  
8  
9  
10  
11  
12  
13  
14  
15  
16  
17  
18  
19  
20  
21  
22  
23  
24  
25

## Supplementary Information

### Differentiation of adsorption and degradation in steroid hormone micropollutants removal using electrochemical carbon nanotube membrane

Siqi Liu<sup>1</sup>, David Jassby<sup>2</sup>, Daniel Mandler<sup>3</sup>, & Andrea I. Schäfer<sup>1\*</sup>

<sup>1</sup>*Institute for Advanced Membrane Technology (IAMT), Karlsruhe Institute of Technology (KIT),  
Eggenstein-Leopoldshafen, Germany*

<sup>2</sup>*Department of Civil and Environmental Engineering, University of California, Los Angeles, Los  
Angeles, United States*

<sup>3</sup>*Institute of Chemistry, The Hebrew University of Jerusalem, Jerusalem, Israel.*

\*Corresponding author: [Andrea.Iris.Schaefer@kit.edu](mailto:Andrea.Iris.Schaefer@kit.edu) (A. I. Schäfer), +49 (0)721 6082 6906

*Revision submitted to  
Nature Communications  
Special Issue: Water Treatment and Harvesting  
29/08/2024*

26 **Supplementary Discussion 1. Contribution of adsorption and degradation to electrochemical**  
27 **removal of estradiol**

28 To study the electrochemical removal process as a function of the filtration volume, the mass balance  
29 analysis was conducted for the experiment at standard conditions within different permeate volume  
30 range (Supplementary Figure 1).

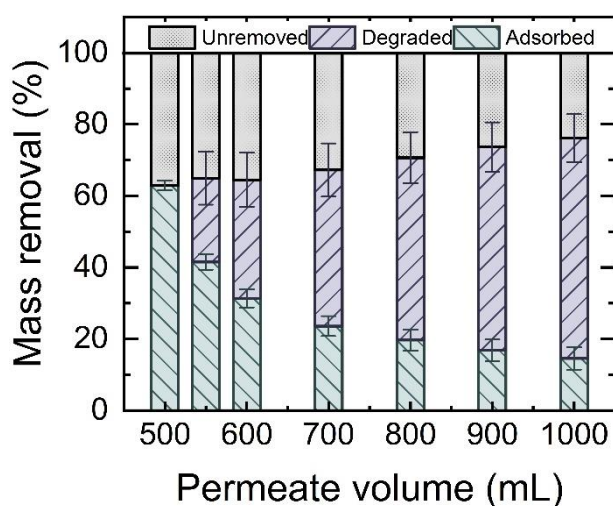

Supplementary Figure 1.  
Contribution of electrochemical adsorption and degradation to the mass removal of E2 within the CNT EMR as a function of the permeate volume.  $c_{f,E2} = 1 \mu\text{g L}^{-1}$ ,  $V_{cell} = 1.6 \text{ V}$ ,  $J_f = 150 \text{ L m}^{-2} \text{ h}^{-1}$  ( $5 \text{ mL min}^{-1}$ ),  $1 \text{ mM NaHCO}_3$ ,  $10 \text{ mM NaCl}$ ,  $27.2 \text{ mg L}^{-1} \text{ EtOH}$ ,  $79.2 \text{ mg L}^{-1} \text{ MeOH}$ ,  $\text{pH } 8.2 \pm 0.2$ ,  $23 \pm 1 \text{ }^\circ\text{C}$ . Voltage on at 500 mL. Error bars represent propagated error from operational parameter variations and analytical error.

31 At 500 mL of permeate, the total mass of removed E2 was  $63 \pm 1\%$ , solely attributed to adsorption.  
32 Upon activating the voltage at 500 mL, total mass removal increased from  $63 \pm 1\%$  to  $76 \pm 10\%$  as the  
33 permeate volume increased from 500 to 1000 mL.

34 The contribution from degradation to total mass removal grew from 0 to  $61 \pm 7\%$  over the same volume  
35 range.

36 Meanwhile, the contribution from adsorption decreased from  $63 \pm 1\%$  to  $19 \pm 3\%$  as the permeate  
37 volume increased from 500 to 800 mL and then stabilized upon further increasing the volume to 1000  
38 mL.

39 **Supplementary Discussion 2. Electrochemical degradation of steroid hormone at varying**  
40 **parameters**

41 The influence of cell voltage, water flux, initial concentration and SH type on the electrochemical  
42 degradation was investigated. The profiles of the normalized SHs concentration and the evolution of  
43 UHPLC-FSA chromatograms vs. cumulative permeate volume for all the electrochemical  
44 experiments are shown below. To ascertain the stable conditions during the electrochemical  
45 degradation experiments, the variations in the parameters, including pH, transmembrane pressure,  
46 conductivity, and temperature were monitored and recorded along with the experiments.

47

48

49 **Data for experiments at varying cell voltage**

50 Supplementary Figure 2 and Supplementary Figure 3 show the changes of the normalized SHs  
 51 concentration and the evolution of UHPLC-FSA over 1 L of cumulative permeate volume for  
 52 experiments at varying cell voltage. Supplementary Figure 4 presents the variation of the system  
 53 conditions during the experiments.

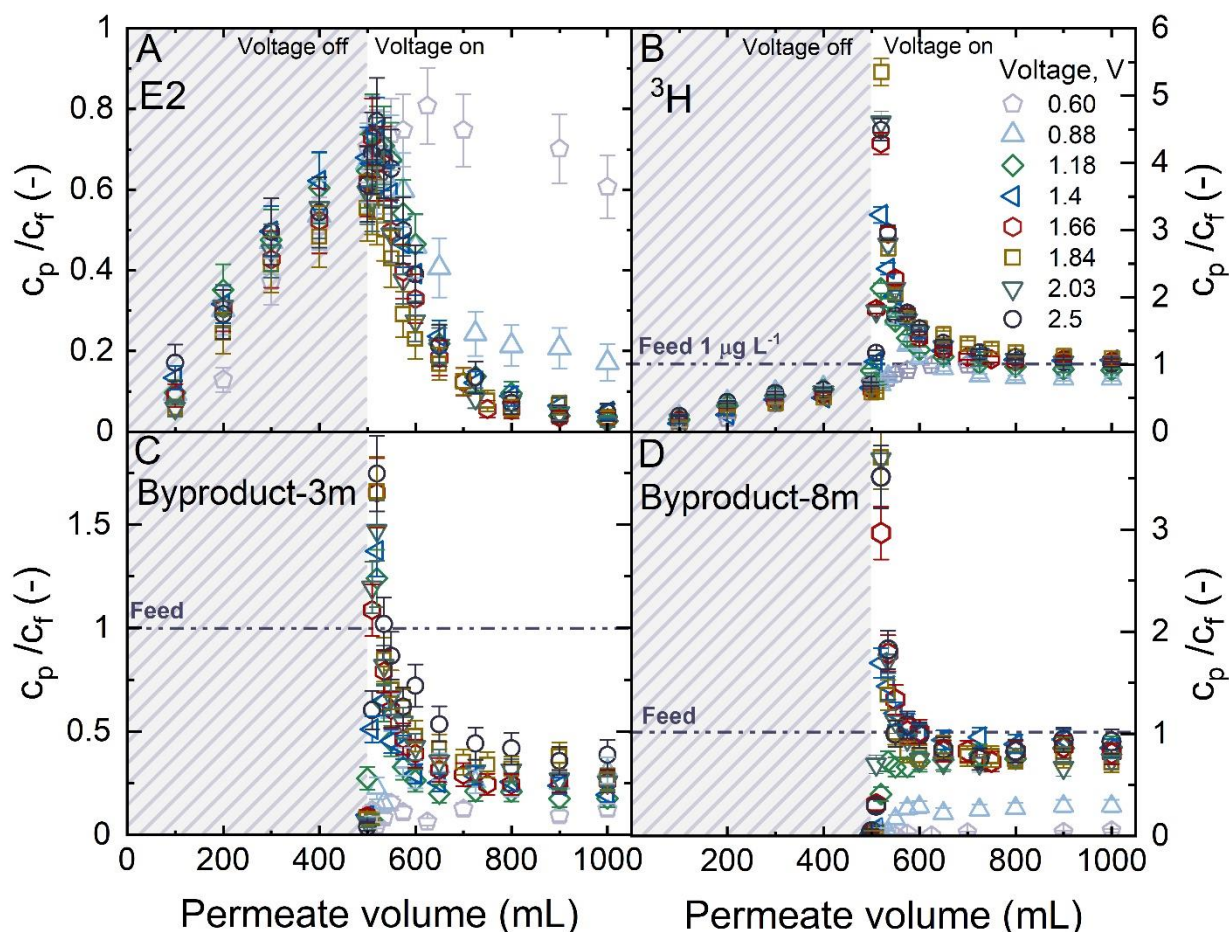

54 Supplementary Figure 2. Effect of cell voltage on the electrochemical degradation of E2 expressed  
 55 as normalized (A) E2 concentration in permeate ( $c_p/c_f$ ), (B)  $^3\text{H}$  activity in permeate ( $c_{p,3H}/c_{f,3H}$ ),  
 56 (C) concentration of byproduct-3m ( $c_{p,prod3}/c_{f,prod3}$ ), and (D) concentration of byproduct-8m  
 57 ( $c_{p,prod8}/c_{f,prod8}$ ) in the permeate vs. accumulated permeate.  $c_{f,E2} = 1 \mu\text{g L}^{-1}$ ,  $J_f = 150 \text{ L m}^{-2} \text{ h}^{-1}$  ( $5$   
 58  $\text{mL min}^{-1}$ ),  $1 \text{ mM NaHCO}_3$ ,  $10 \text{ mM NaCl}$ ,  $27.2 \text{ mg L}^{-1} \text{ EtOH}$ ,  $79.2 \text{ mg L}^{-1} \text{ MeOH}$ ,  $\text{pH } 8.2 \pm 0.2$ ,  
 59  $23 \pm 1 \text{ }^\circ\text{C}$ . Error bars represent propagated error from operational parameter variations and analytical  
 60 error.

61 The steady-state normalized concentration of E2 in the permeate significantly decreased from  
 62  $0.61 \pm 0.07$  to  $0.03 \pm 0.01$  when the cell voltage was raised from 0.6 to 1.2 V, thereafter stabilizing upon  
 63 further increasing the voltage to 2.5 V.

64 Beyond a cell voltage of 1.2 V, the normalized concentration of  $^3\text{H}$  surpassed 1 immediately after the  
 65 voltage was applied and continued to rise steadily with additional voltage increases. Following a  
 66 cumulative permeate volume of 700 mL, the normalized concentration of  $^3\text{H}$  leveled off, approaching

67 1. Concurrently, the normalized concentrations of the two byproducts in the permeate exhibited an  
68 increase in tandem with the cell voltage.

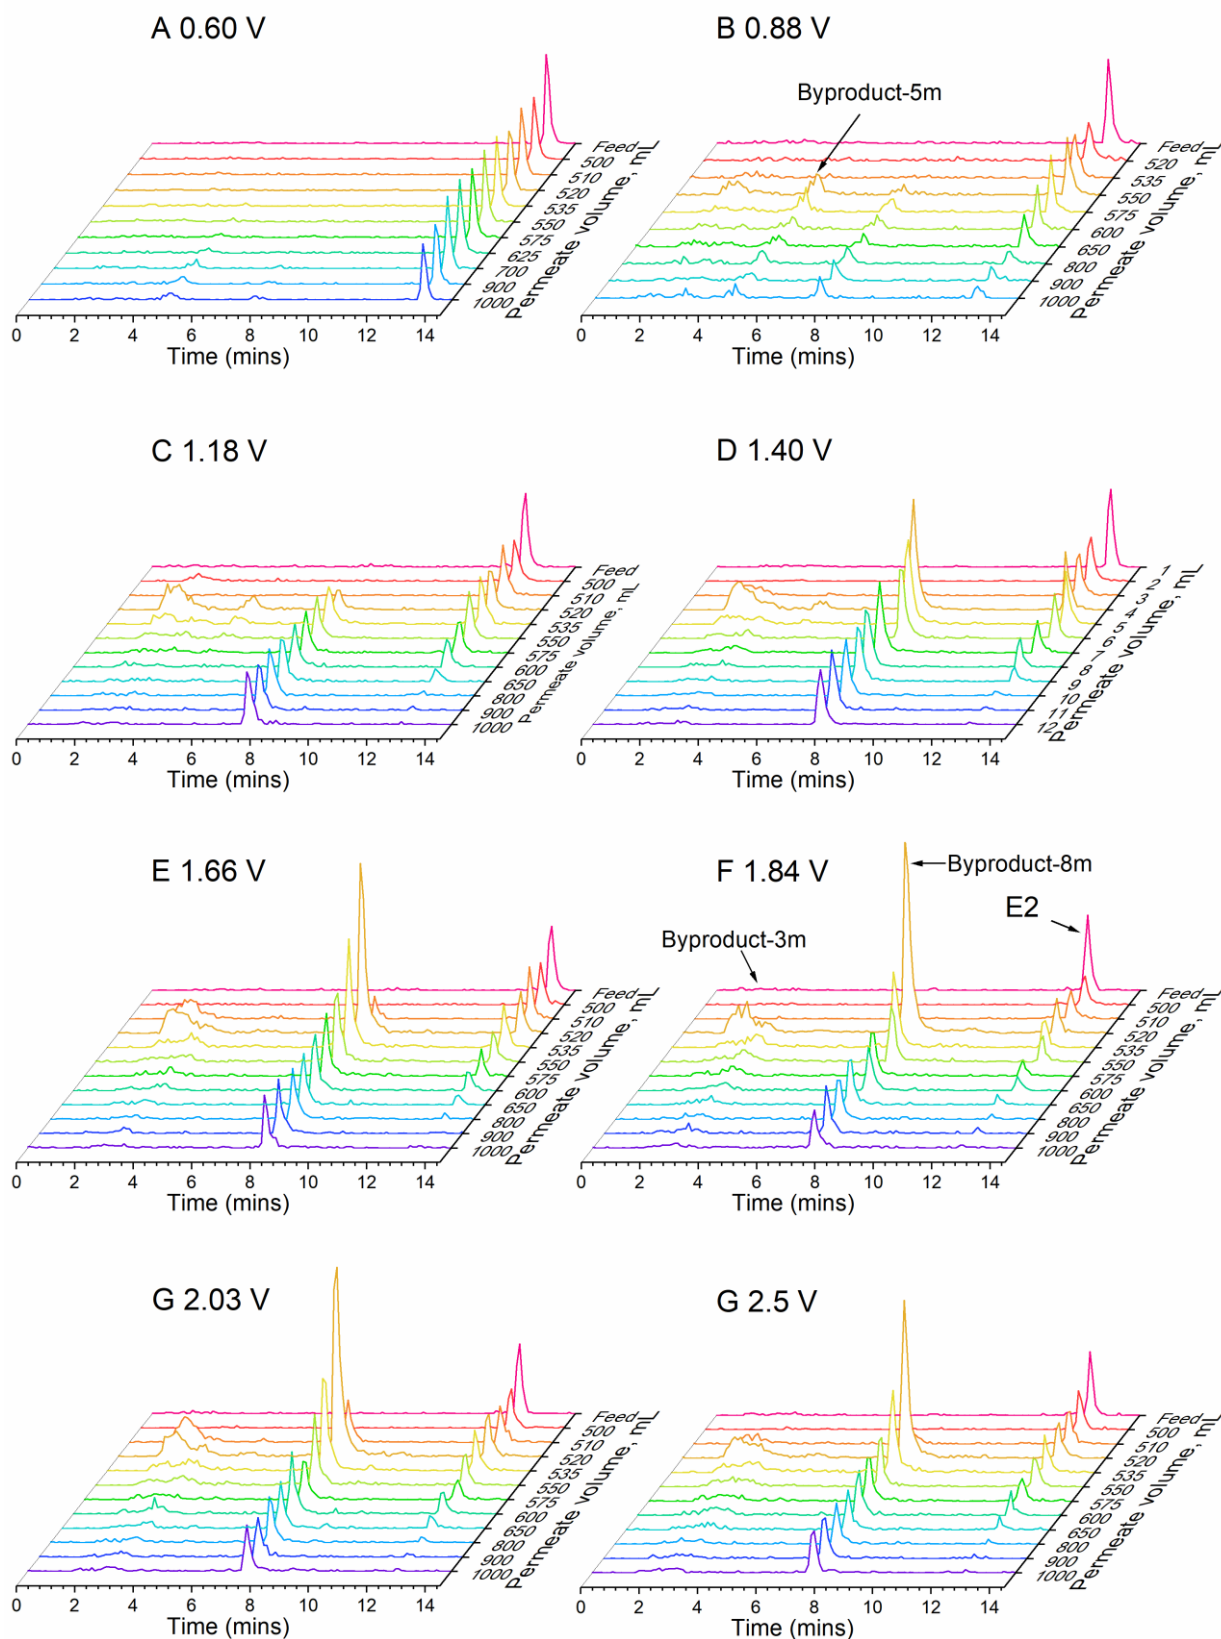

69 Supplementary Figure 3. UHPLC-FSA chromatograms of E2 during the electrochemical  
70 degradation with increasing accumulated permeate volume at varying cell voltage (A) 0.88, (B)

71 1.18, (C) 1.4, (D) 1.66, (E) 1.84, (F) 2.03, and (G) 2.5 V.  $c_{f,E2} = 1 \mu\text{g L}^{-1}$ ,  $J_f = 150 \text{ L m}^{-2} \text{ h}^{-1}$  ( $5 \text{ mL min}^{-1}$ ),  
 72  $1 \text{ mM NaHCO}_3$ ,  $10 \text{ mM NaCl}$ ,  $27.2 \text{ mg L}^{-1} \text{ EtOH}$ ,  $79.2 \text{ mg L}^{-1} \text{ MeOH}$ ,  $\text{pH } 8.2 \pm 0.2$ ,  $23 \pm 1 \text{ }^\circ\text{C}$ .  
 73 No discernible peaks corresponding to byproducts were detected at 0.6 V, whereas at 0.9 V, three  
 74 byproduct peaks appearing at 3, 5, and 8 minutes. With an increase in voltage, the peak associated  
 75 with byproduct-5m vanished.

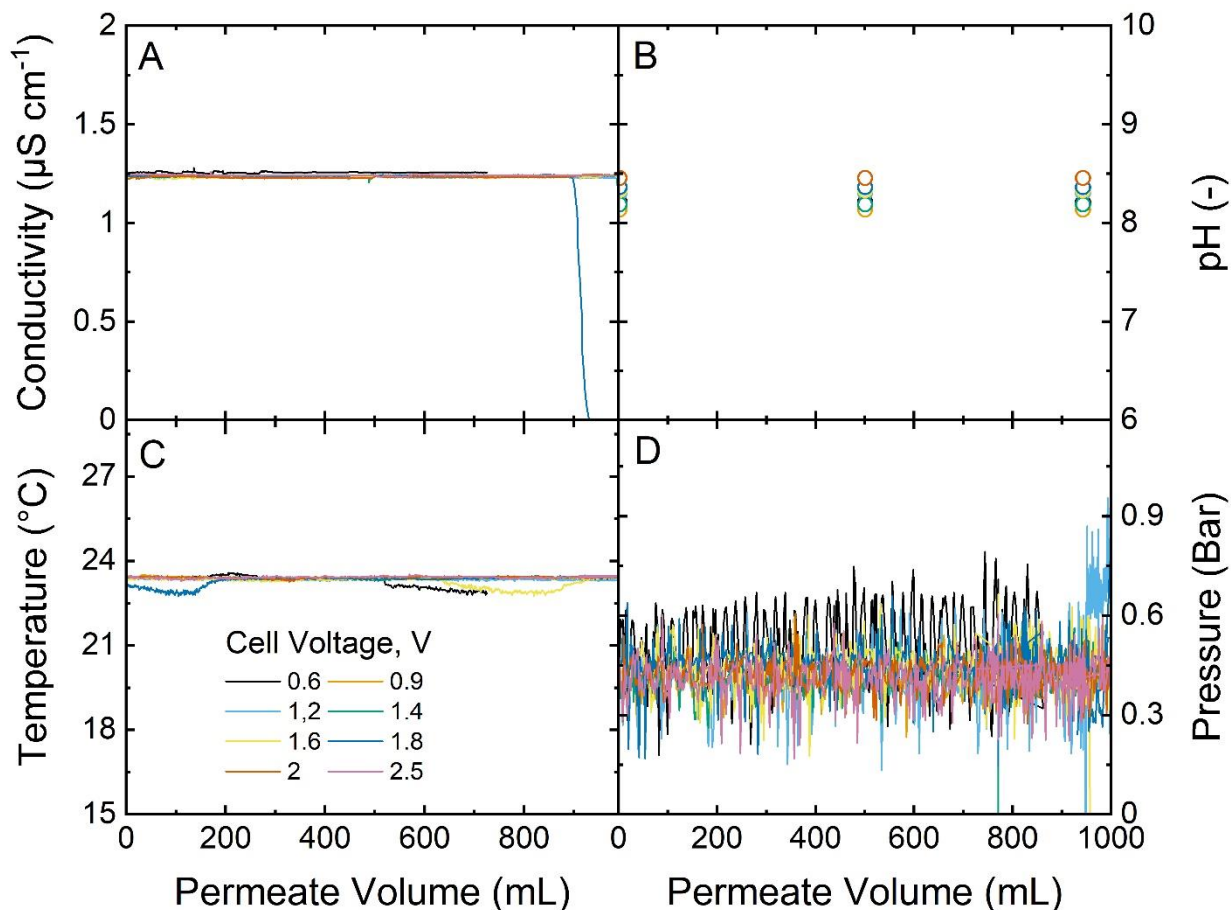

76 Supplementary Figure 4. Variations of (A) conductivity, (B) pH, (C) temperature conductivity, and  
 77 (D) transmembrane pressure during electrochemical filtration experiments at varying cell voltage.  
 78  $c_{f,E2} = 1 \mu\text{g L}^{-1}$ ,  $J_f = 150 \text{ L m}^{-2} \text{ h}^{-1}$  ( $5 \text{ mL min}^{-1}$ ),  $1 \text{ mM NaHCO}_3$ ,  $10 \text{ mM NaCl}$ ,  $27.2 \text{ mg L}^{-1} \text{ EtOH}$ ,  
 79  $79.2 \text{ mg L}^{-1} \text{ MeOH}$ ,  $\text{pH } 8.2 \pm 0.2$ ,  $23 \pm 1 \text{ }^\circ\text{C}$ .

80 The system parameters remained stable during the filtration experiments.

81

82 **Data for experiments at varying flux**

83 Supplementary Figure 5 and Supplementary Figure 6 show the changes of the normalized SHs  
 84 concentration and the evolution of UHPLC-FSA over 1 L of cumulative permeate volume for  
 85 experiments at varying flux. Supplementary Figure 7. presents the variation of the system conditions  
 86 during the experiments.

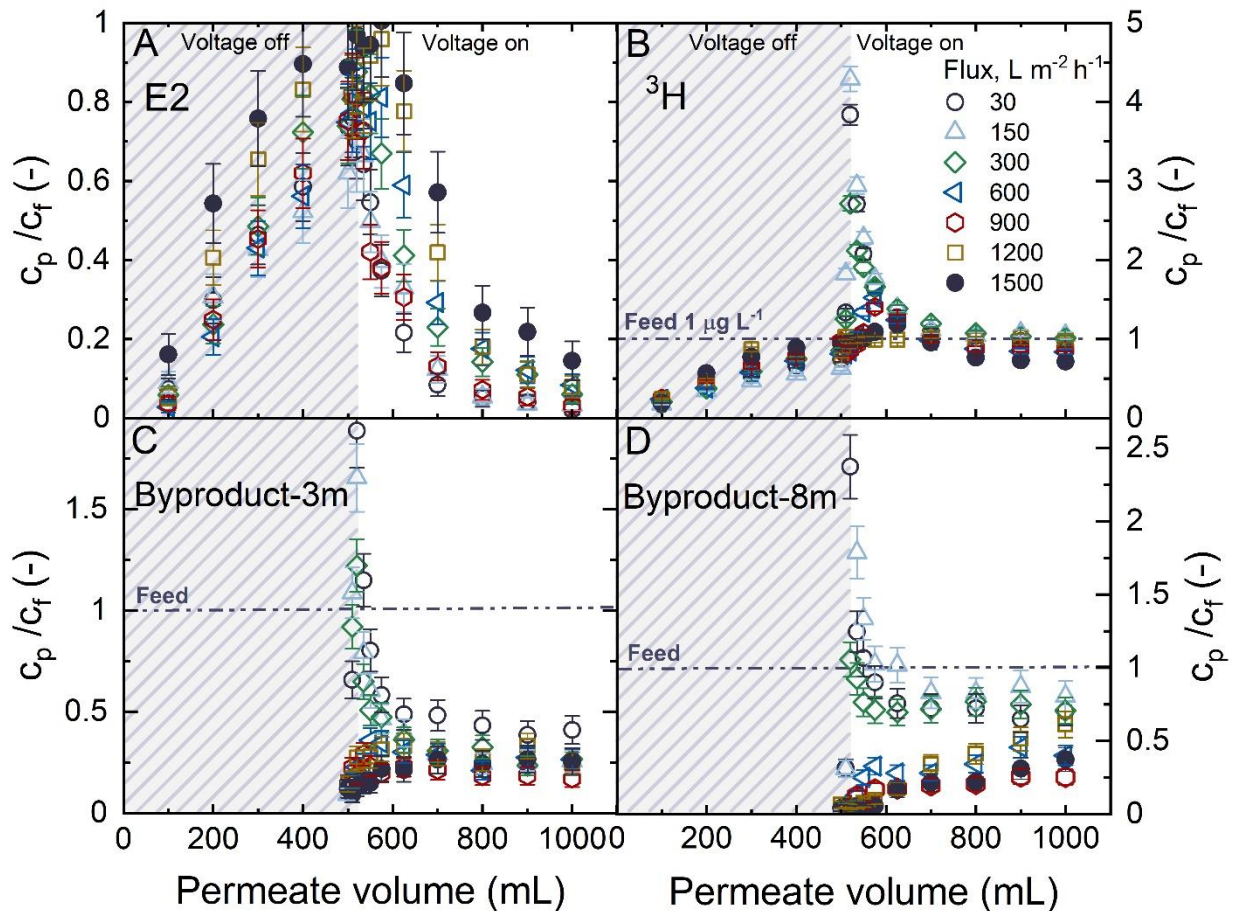

87 Supplementary Figure 5. Effect of water flux on the electrochemical degradation of E2 expressed as  
 88 normalized (A) E2 concentration in permeate ( $c_{p,E2}/c_{f,E2}$ ), (B)  $^3H$  activity in permeate  
 89 ( $c_{p,3H}/c_{f,3H}$ ), (C) concentration of byproduct-3m ( $c_{p,met3}/c_{f,met3}$ ), and (D) concentration of  
 90 byproduct-8m ( $c_{p,met8}/c_{f,met8}$ ) in the permeate vs. accumulated permeate.  $c_{f,E2} = 1 \mu g L^{-1}$ ,  $V_{cell} =$   
 91  $1.66 V$ ,  $1 mM NaHCO_3$ ,  $10 mM NaCl$ ,  $27.2 mg L^{-1} EtOH$ ,  $79.2 mg L^{-1} MeOH$ ,  $pH 8.2 \pm 0.2$ ,  
 92  $23 \pm 1 ^\circ C$ . Error bars represent propagated error from operational parameter variations and analytical  
 93 error.

94 Elevating the flux from 30 to 1500  $L m^{-2} h^{-1}$  had a negligible impact on the steady-state concentration  
 95 of E2, which observed a slight increase from  $0.02 \pm 0.01$  to  $0.14 \pm 0.05$ .

96 After activating the voltage, the normalized concentration of  $^3H$  in the permeate rose as the flux  
 97 decreased. Similarly, the normalized concentration of byproducts in the permeate also augmented  
 98 with the reduction in flux.

99

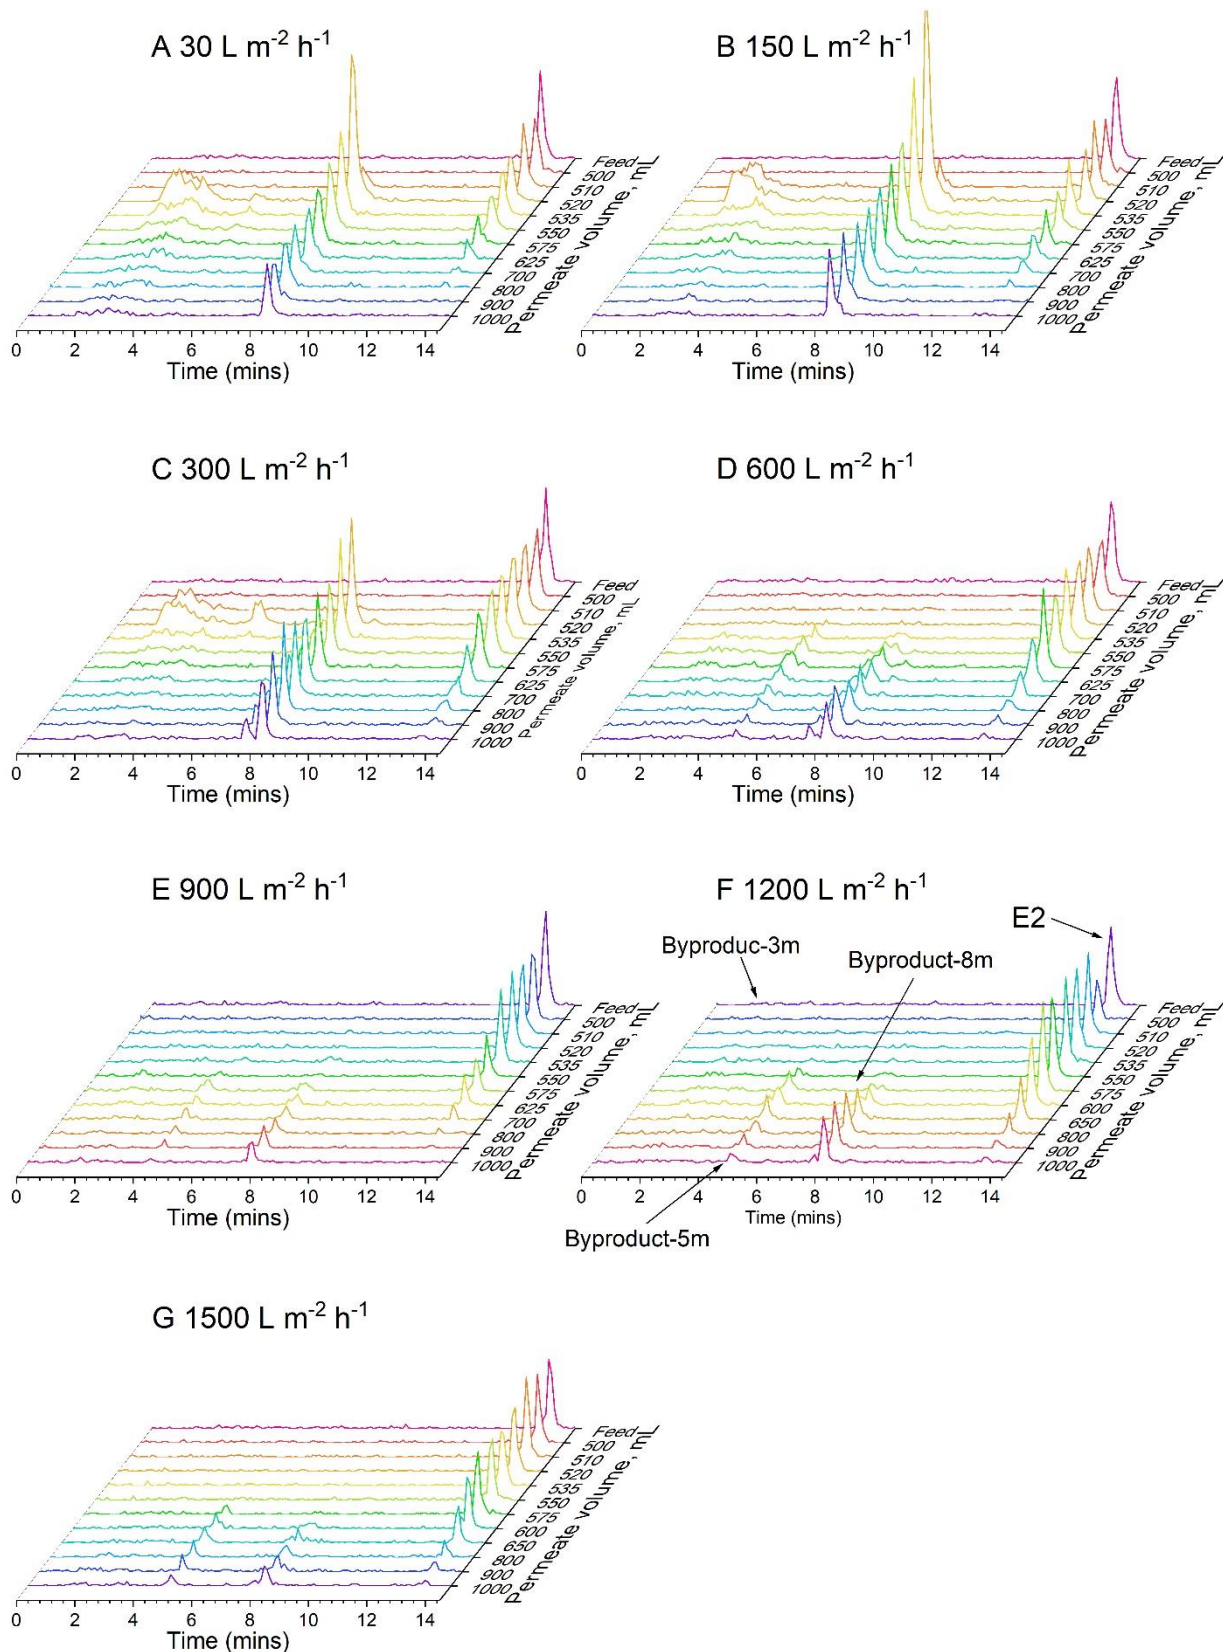

100 Supplementary Figure 6. UHPLC-FSA chromatograms of E2 during the electrochemical  
 101 degradation with increasing accumulated permeate volume at varying flux (A) 30, (B) 150, (C) 600,  
 102 (D) 900, (E) 1200 and (F) 1500 L m<sup>-2</sup> h<sup>-1</sup>.  $c_{f,E2} = 1 \mu\text{g L}^{-1}$ ,  $V_{cell} = 1.6 \text{ V}$ , 1 mM NaHCO<sub>3</sub>, 10 mM  
 103 NaCl, 27.2 mg L<sup>-1</sup> EtOH, 79.2 mg L<sup>-1</sup> MeOH, pH 8.2±0.2, 23±1 °C.

104 In the UHPLC chromatograms, two byproducts appearing at approximately 3 and 8 minutes were  
105 detected at flux of 30 and 150 L m<sup>-2</sup> h<sup>-1</sup>.

106 A byproduct emerging at 5 minutes became evident when the flux was increased to 300 L m<sup>-2</sup> h<sup>-1</sup>. The  
107 peak area of byproduct-5m initially rose with an increase in flux to 600 L m<sup>-2</sup> h<sup>-1</sup> and then declined  
108 upon further increasing the flux to 1500 L m<sup>-2</sup> h<sup>-1</sup>.

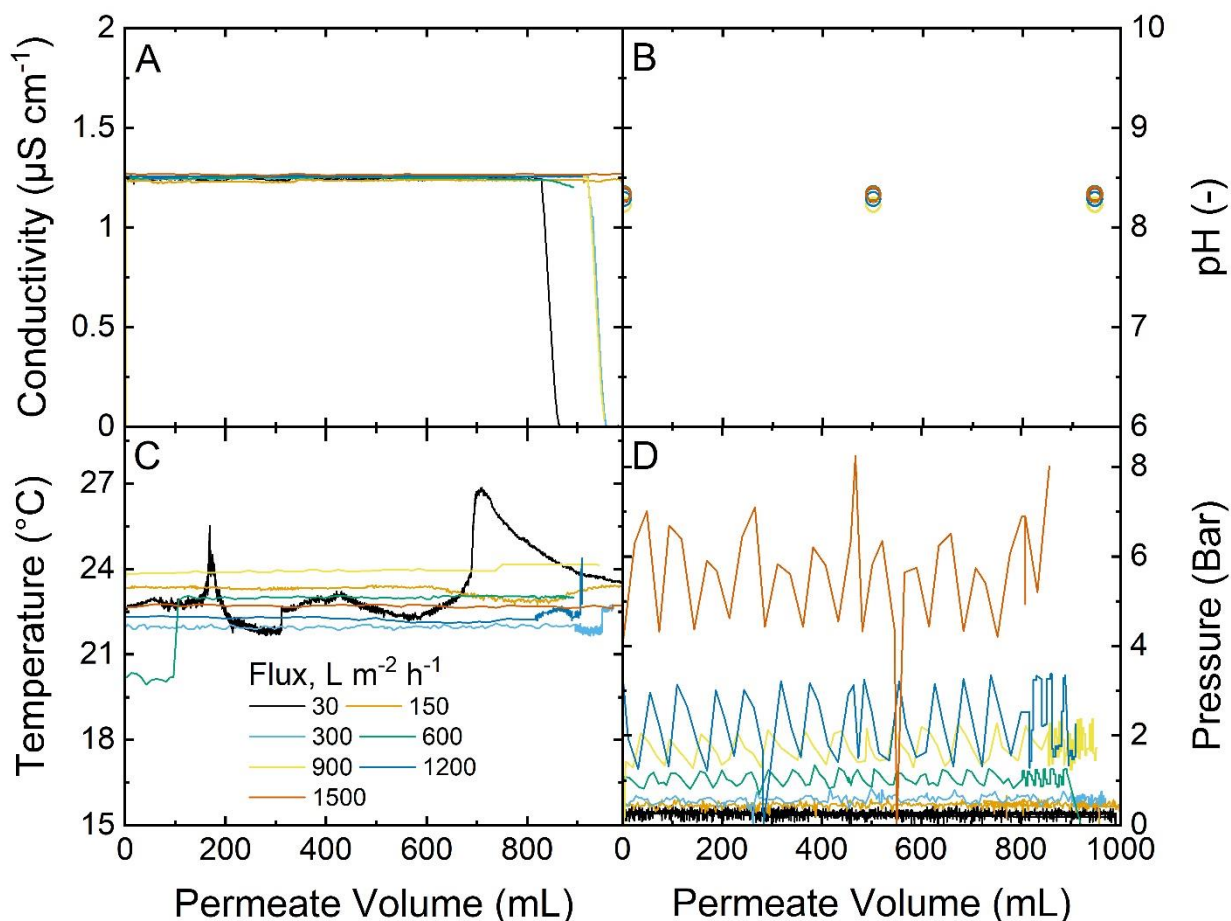

109

110 Supplementary Figure 7. Variations of (A) conductivity, (B) pH, (C) temperature conductivity, and  
111 (D) transmembrane pressure during electrochemical filtration experiments at varying flux.  $c_{f,E2} = 1$   
112  $\mu\text{g L}^{-1}$ ,  $V_{cell} = 1.6 \text{ V}$ , 1 mM NaHCO<sub>3</sub>, 10 mM NaCl, 27.2 mg L<sup>-1</sup> EtOH, 79.2 mg L<sup>-1</sup> MeOH, pH  
113  $8.2 \pm 0.2$ ,  $23 \pm 1 \text{ }^\circ\text{C}$ .

114 The temperature at 30 L m<sup>-2</sup> h<sup>-1</sup> exhibited large variation, which was likely due to the sensors being  
115 accidentally touched by the operator.

116 The large variation in pressure at high flux may be attributed to the pulsating nature of the peristaltic  
117 pump. Peristaltic pumps operate by compressing and releasing a length of tubing, inherently  
118 producing a pulsating flow. This effect tends to be more significant at higher fluxes, where the  
119 pulsations can greatly influence pressure stability.

120

121



122 **Data for experiments at varying steroid hormone concentration**

123 Supplementary Figure 8. and Supplementary Figure 9. show the changes of the normalized SHs  
 124 concentration and the evolution of UHPLC-FSA over 1 L of cumulative permeate volume for  
 125 experiments at varying E2 concentration. Supplementary Figure 10. presents the variation of the  
 126 system conditions during the experiments.

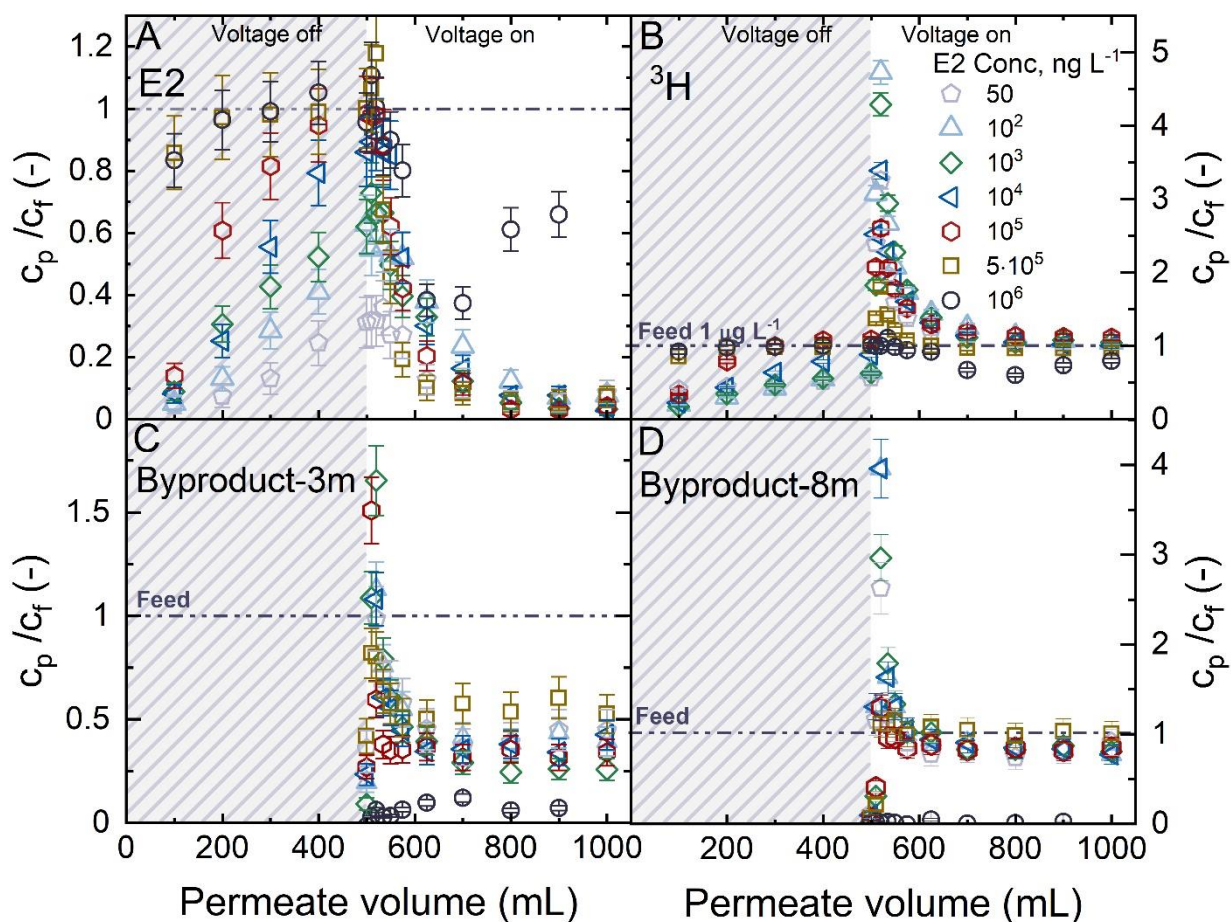

127 Supplementary Figure 8. Effect of SH concentration on the electrochemical degradation of E2  
 128 expressed as normalized (A) E2 concentration in permeate ( $c_{p,E2}/c_{f,E2}$ ), (B)  $^3\text{H}$  activity in permeate  
 129 ( $c_{p,3H}/c_{f,3H}$ ), (C) concentration of byproduct-3m ( $c_{p,met3}/c_{f,met3}$ ), and (D) concentration of  
 130 byproduct-8m ( $c_{p,met8}/c_{f,met8}$ ) in the permeate vs. accumulated permeate.  $V_{cell} = 1.6 \text{ V}$ ,  $J_f = 150 \text{ L}$   
 131  $\text{m}^{-2} \text{h}^{-1}$  ( $5 \text{ mL min}^{-1}$ ),  $1 \text{ mM NaHCO}_3$ ,  $10 \text{ mM NaCl}$ ,  $27.2 \text{ mg L}^{-1} \text{ EtOH}$ ,  $79.2 \text{ mg L}^{-1} \text{ MeOH}$ , pH  
 132  $8.2 \pm 0.2$ ,  $23 \pm 1 \text{ }^\circ\text{C}$ . Error bars represent propagated error from operational parameter variations and  
 133 analytical error.

134 At elevated concentrations of E2, the membrane becomes saturated with E2 more quickly.

135 The steady-state normalized concentration of E2 remained relatively constant across the  
 136 concentration range of 50 to 500,000  $\text{ng L}^{-1}$ , but sharply increased to  $0.66 \pm 0.07$  at an E2 concentration  
 137 of  $10^6 \text{ ng L}^{-1}$ .

138 After activating the voltage, the normalized concentration of  $^3\text{H}$  in the permeate decreased with an  
139 increase in E2 concentration from  $10^2$  to  $10^6$   $\text{ng L}^{-1}$ , a trend that was similarly observed for the  
140 normalized concentration of byproducts in the permeate.

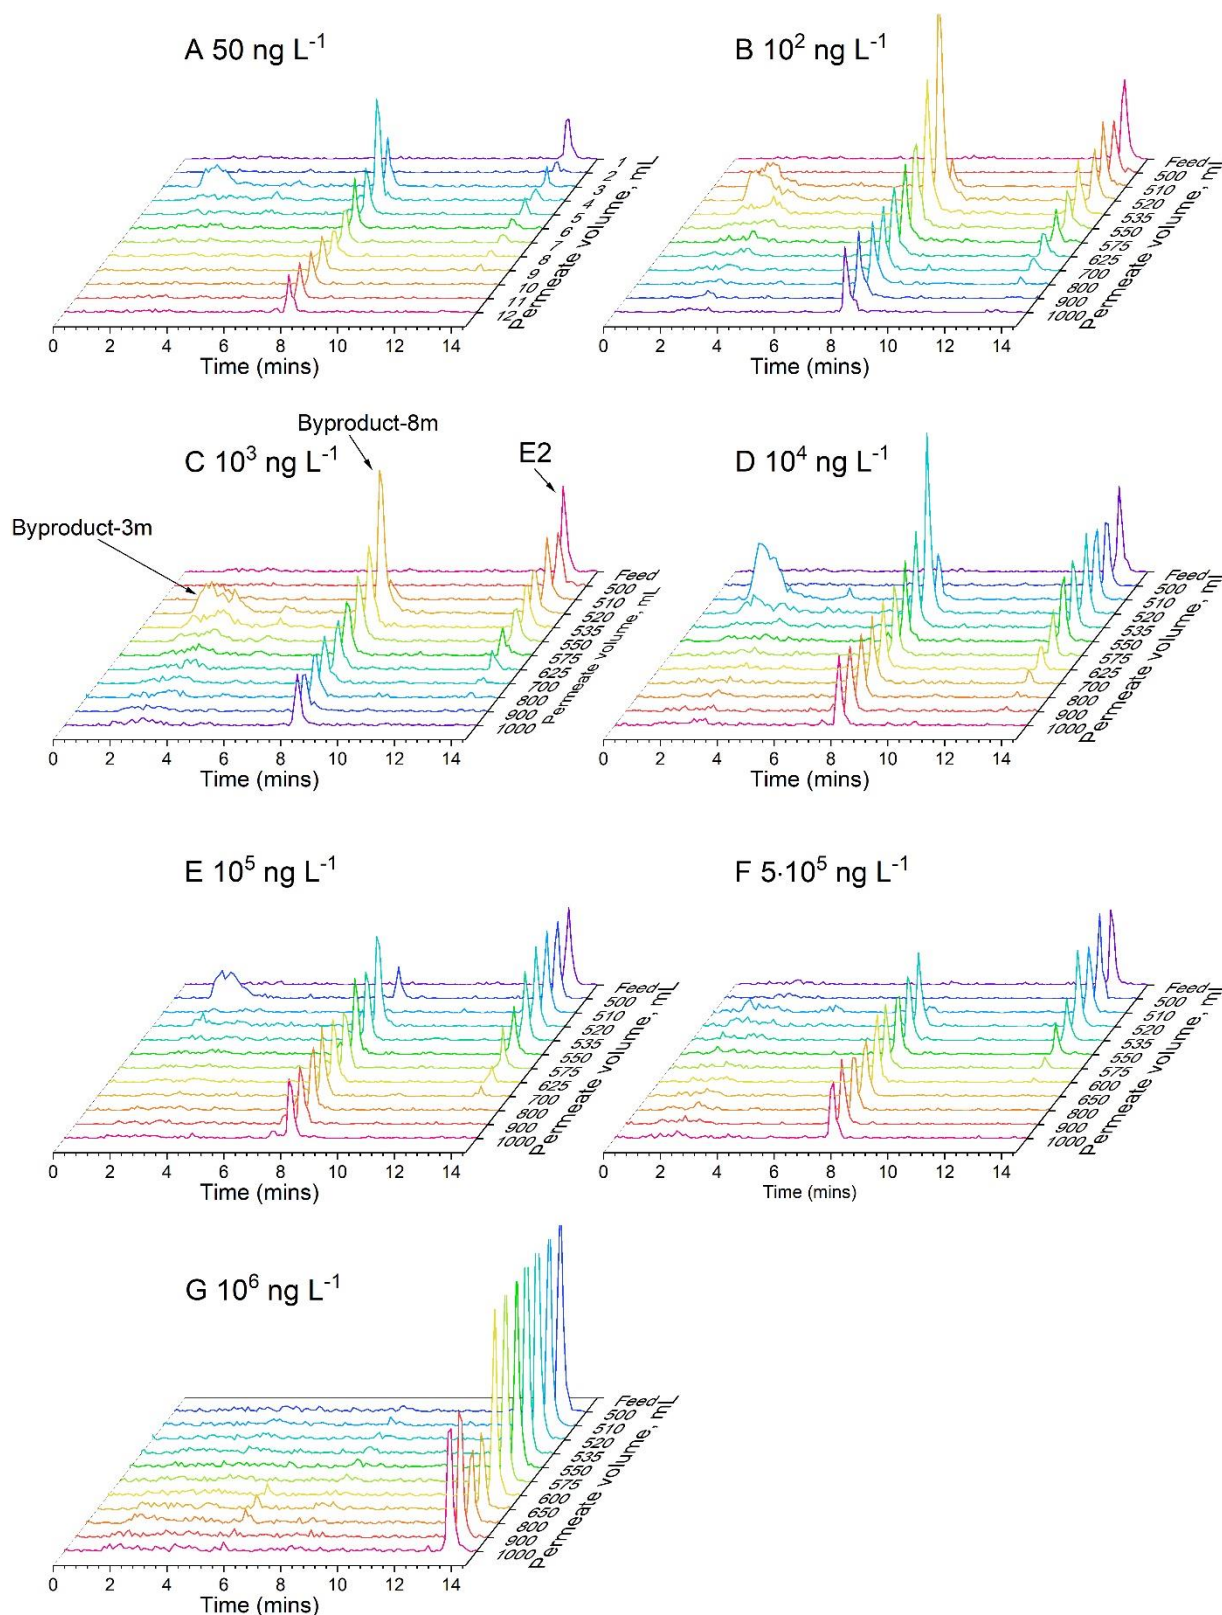

141 Supplementary Figure 9. UHPLC-FSA chromatograms of E2 during the electrochemical  
142 degradation with increasing accumulated permeate volume at varying flux (A) 50, (B)  $10^2$ , (C)  $10^3$ ,

143 (D)  $10^4$ , (E)  $10^5$ , (F)  $5 \cdot 10^5$ , and (G)  $10^6$   $\text{ng L}^{-1}$ .  $c_{f,E2} = 1 \mu\text{g L}^{-1}$ ,  $V_{cell} = 1.6 \text{ V}$ ,  $J_f = 150 \text{ L m}^{-2} \text{ h}^{-1}$  ( $5$   
144  $\text{mL min}^{-1}$ ),  $1 \text{ mM NaHCO}_3$ ,  $10 \text{ mM NaCl}$ ,  $27.2 \text{ mg L}^{-1} \text{ EtOH}$ ,  $79.2 \text{ mg L}^{-1} \text{ MeOH}$ ,  $\text{pH } 8.2 \pm 0.2$ ,  
145  $23 \pm 1 \text{ }^\circ\text{C}$ .

146 The peak area of the byproducts showed a consistent decrease as the E2 concentration increased from  
147  $10^2$  to  $10^6$   $\text{ng L}^{-1}$ . However, this decrease should not be interpreted as fewer byproducts being  
148 generated at higher concentrations.

149 The reason is that feed solutions with E2 concentrations above  $100 \text{ ng L}^{-1}$  were composed of a mixture  
150 of radiolabeled and non-labeled E2, and the non-labeled E2 was not detectable using the UHPLC-  
151 FSA method.

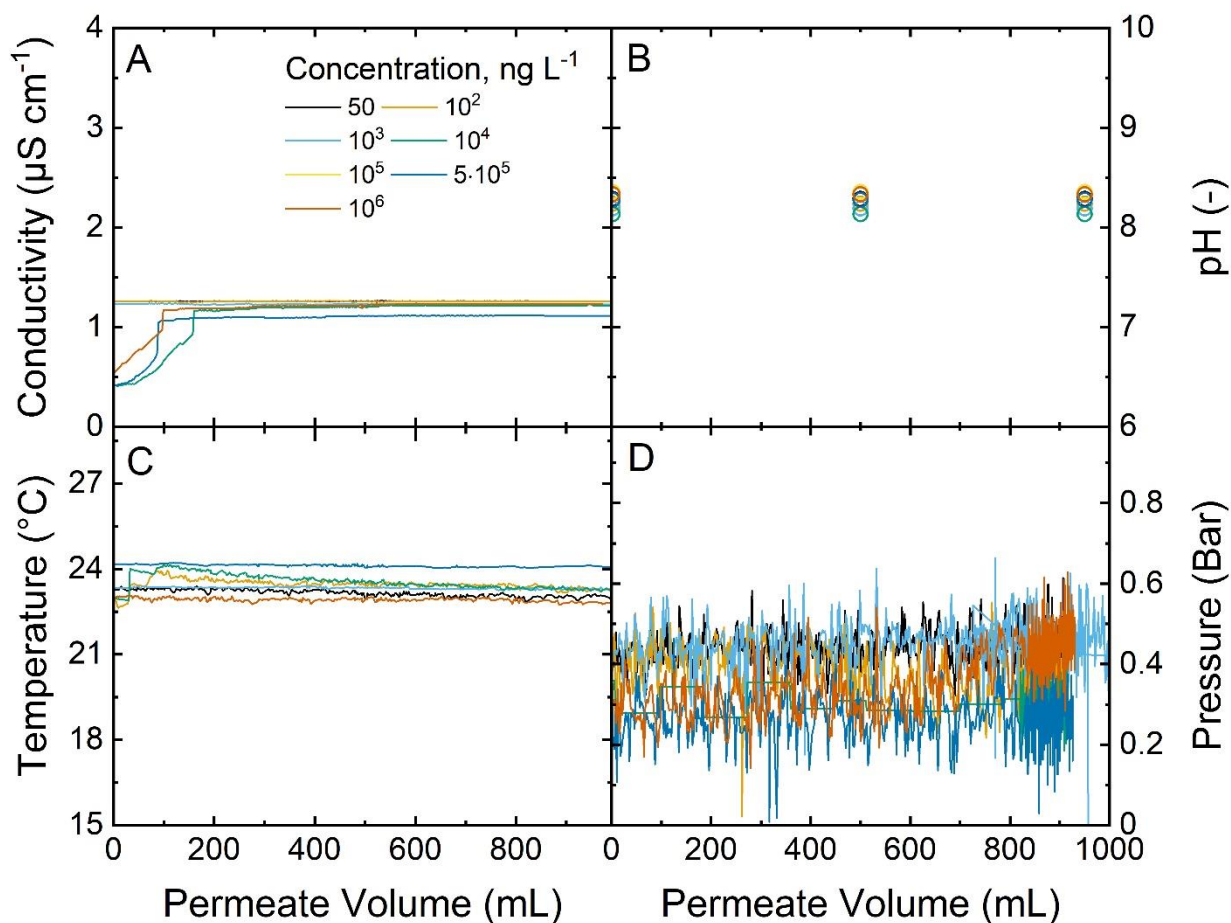

152

153 Supplementary Figure 10. Variations of (A) conductivity, (B) pH, (C) temperature conductivity, and  
154 (D) transmembrane pressure during electrochemical filtration experiments at varying concentration.  
155  $c_{f,E2} = 1 \mu\text{g L}^{-1}$ ,  $V_{cell} = 1.6 \text{ V}$ ,  $J_f = 150 \text{ L m}^{-2} \text{ h}^{-1}$  ( $5 \text{ mL min}^{-1}$ ),  $1 \text{ mM NaHCO}_3$ ,  $10 \text{ mM NaCl}$ ,  $27.2$   
156  $\text{mg L}^{-1} \text{ EtOH}$ ,  $79.2 \text{ mg L}^{-1} \text{ MeOH}$ ,  $\text{pH } 8.2 \pm 0.2$ ,  $23 \pm 1 \text{ }^\circ\text{C}$ .

157 The system parameters remained stable during the filtration experiments.

158 **Data for experiments at varying steroid hormone types**

159 Supplementary Figure 11. shows the changes of the normalized SHs concentration and the evolution  
160 of UHPLC-FSA over 1 L of cumulative permeate volume for experiments at varying SH types.

161 Supplementary Figure 12. presents the variation of the system conditions during the experiments.

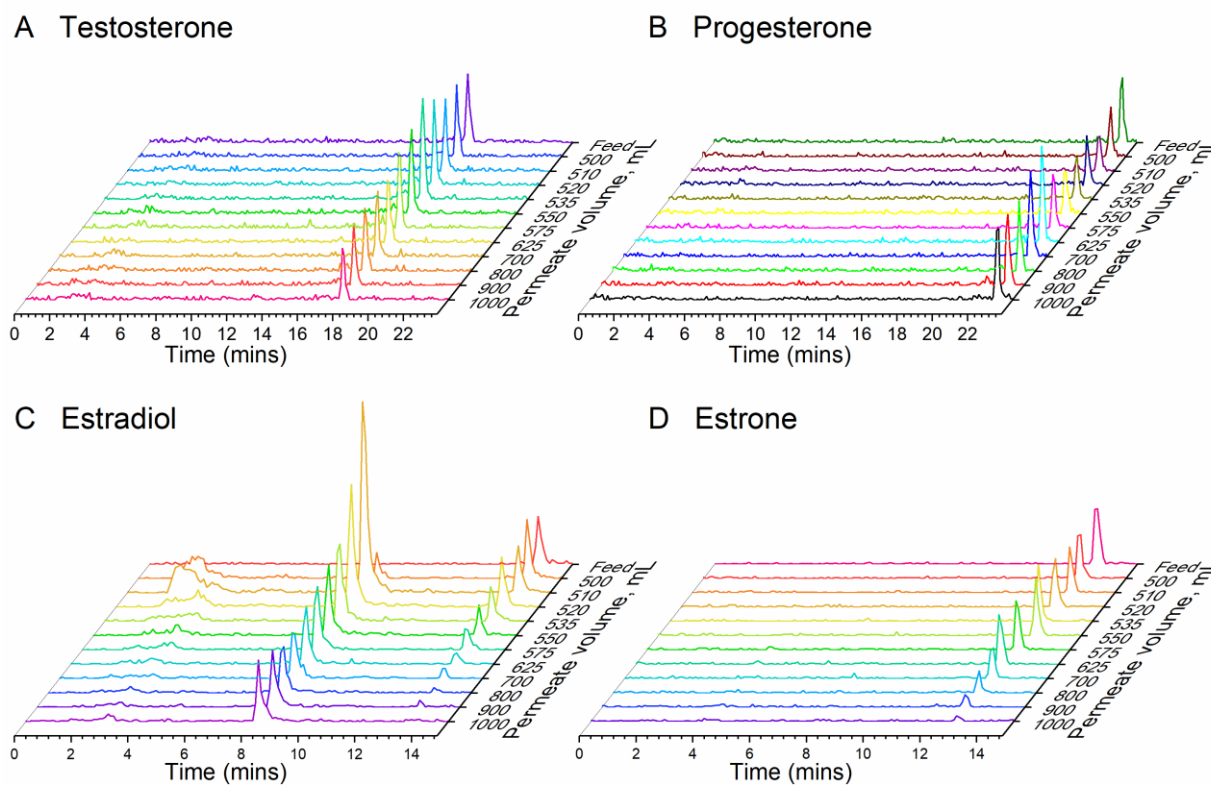

162 Supplementary Figure 11. UHPLC-FSA chromatograms of E2 during the electrochemical  
163 degradation with increasing accumulated permeate volume at varying flux (A) testosterone, (B)  
164 progesterone, (C) estradiol and (D) estrone.  $c_{f,SH} = 1 \mu\text{g L}^{-1}$ ,  $V_{cell} = 1.6 \text{ V}$ ,  $J_f = 150 \text{ L m}^{-2} \text{ h}^{-1}$  ( $5 \text{ mL}$   
165  $\text{min}^{-1}$ ),  $1 \text{ mM NaHCO}_3$ ,  $10 \text{ mM NaCl}$ ,  $27.2 \text{ mg L}^{-1} \text{ EtOH}$ ,  $79.2 \text{ mg L}^{-1} \text{ MeOH}$ ,  $\text{pH } 8.2 \pm 0.2$ ,  $23 \pm 1 \text{ }^\circ\text{C}$ .

166 No significant byproducts were detected in the UHPLC chromatograms for for T and P.

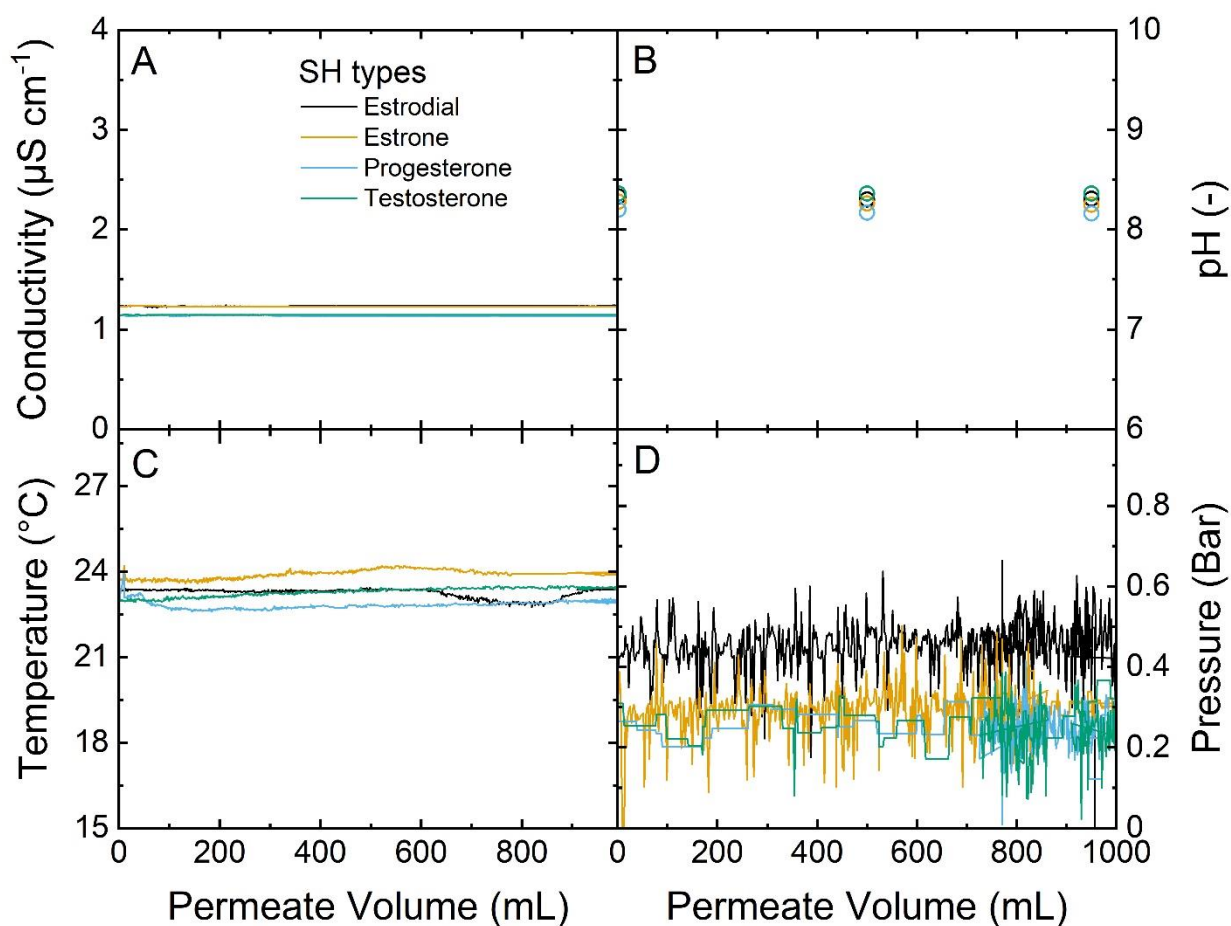

167

168 Supplementary Figure 12. Variations of (A) conductivity, (B) pH, (C) temperature conductivity, and  
 169 (D) transmembrane pressure during electrochemical filtration experiments at varying SH types.  
 170  $c_{f,SH} = 1 \mu\text{g L}^{-1}$ ,  $V_{cell} = 1.6 \text{ V}$ ,  $J_f = 150 \text{ L mh}$  ( $5 \text{ mL min}^{-1}$ ),  $1 \text{ mM NaHCO}_3$ ,  $10 \text{ mM NaCl}$ ,  $27.2 \text{ mg}$   
 171  $\text{L}^{-1} \text{ EtOH}$ ,  $79.2 \text{ mg L}^{-1} \text{ MeOH}$ ,  $\text{pH } 8.2 \pm 0.2$ ,  $23 \pm 1 \text{ }^\circ\text{C}$ .

172 The change in the pattern of pressure fluctuations before and after 300 mL permeate volume for P  
 173 and T was likely due to a decrease in the intervals of data sampling, resulting in a more continuous  
 174 line before 300 mL.

## 175 **Supplementary Methods**

### 176 **Supplementary Discussion 3. Experimental system and protocol**

#### 177 **Electrochemical filtration system**

178 A custom-built flow-through electrochemical filtration set-up (Figure 1) was used in this work for  
 179 investigation of SH removal with the CNT electrochemical membrane. The experimental setup is  
 180 comprehensively equipped with various key components: A thermostatic circulator (Pilot One CC-  
 181 K6s, Huber, Germany) is connected to a 1-L jacketed glass container to maintain the temperature of  
 182 the feed solution at  $23 \pm 1 \text{ }^\circ\text{C}$ , a peristaltic pump (07528-30, MasterFlex, USA) is utilized to drive the  
 183 influent solution, a commercial electrochemical filtration cell (CF016A, SterliTech, USA), with its  
 184 voltage regulated by a direct current power supply (DPPS 60-15, VoltCraft, Germany). The  
 185 transmembrane pressure is monitored by in-line pressure sensors (0-25 bar, WIKA A-10, Alexander

186 Wiegand SE & Co. KG, Germany) on both sides of the cell. A pH meter (pH/cond 3320, WTW,  
187 Germany) equipped with an electrode (SenTix81, WTW, Germany) and a conductivity sensor (CR-  
188 EC, JUMO, Germany) are employed for the measurement of pH and conductivity of the feed solution.  
189 Further, the temperature and conductivity of the permeate are assessed using an in-line thermocouple  
190 (NI USB-TC01, NI, USA) and another conductivity sensor (CR-EC, JUMO, Germany). Finally, a  
191 data acquisition card (DAQ, USB-6000, NI, USA) is integrated into the system for the acquisition  
192 and management of data from these various components.

### 193 **Electrochemical filtration cell**

194 The EMR (Supplementary Figure 13.) used in this work, constructed from durable acrylic, is designed  
195 for the study of electrochemical strategies within an electrochemical membrane in a flow-through  
196 configuration.

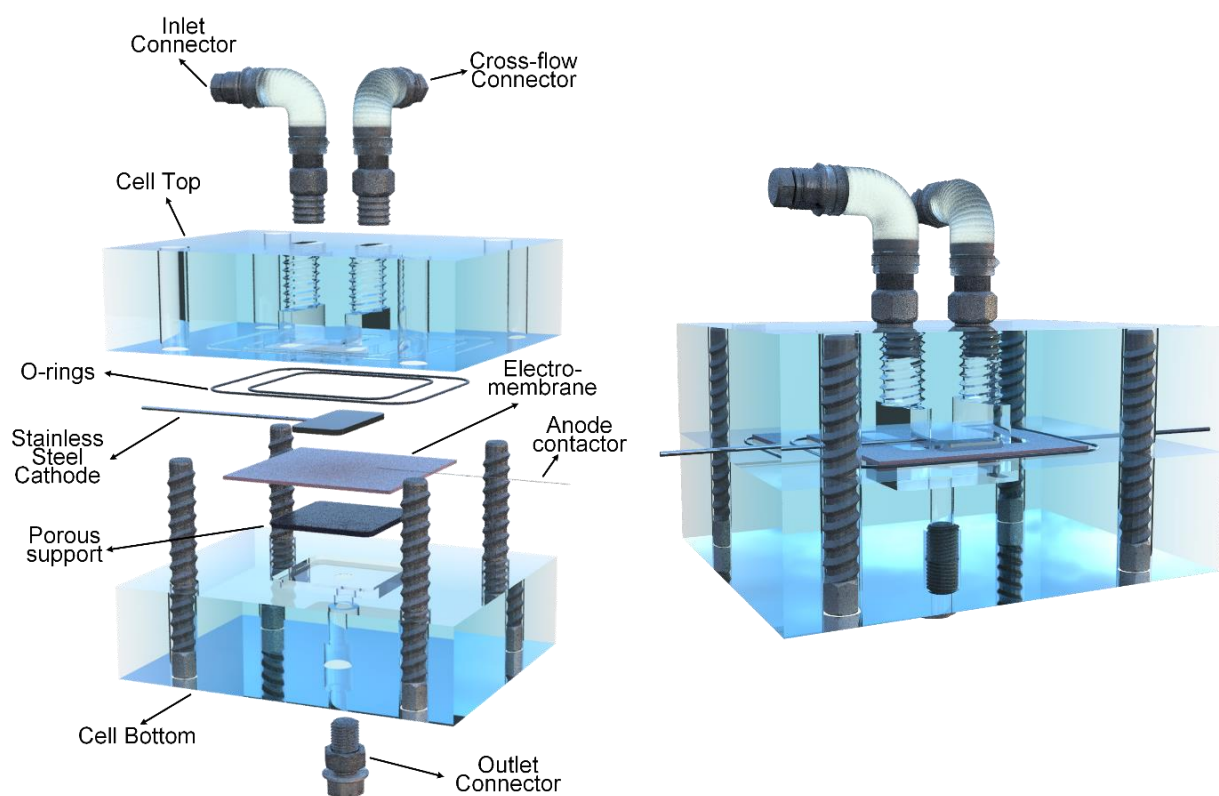

Supplementary Figure 13. Schematic diagram of the electrochemical membrane reactor.

197 Its central feature is an electrochemical membrane with a working area of 20 cm<sup>2</sup> (4.5 cm x 4.5 cm),  
198 serving as the flow-through anode. Opposite to this, a stainless steel plate positioned 2.3 mm apart  
199 from the membrane functions as the cathode, with good conductivity and strength. Other design of  
200 the cell includes a titanium rod connected to the cathode and a platinum (Pt) wire atop the membrane,  
201 facilitating electrical connections to an external power supply.

### 202 **Electrochemical filtration protocol**

203 All electrochemical filtration experiments were conducted in dead-end mode, following a protocol  
 204 outlined in Supplementary Table 1.

205 Supplementary Table 1. Experiment protocol for electrochemical filtration experiments.

| No. | Step                                      | Conditions                                                                                                                                                                                  | Justification                                             |
|-----|-------------------------------------------|---------------------------------------------------------------------------------------------------------------------------------------------------------------------------------------------|-----------------------------------------------------------|
| 1   | Purging of the pump with MilliQ           | 90 mL min <sup>-1</sup> for 30 s of MilliQ with valve ① & valve ③ open, and with valve ② closed                                                                                             | -Remove the air bubbles in the pump head                  |
| 2   | Flushing the system with MilliQ           | 40 mL min <sup>-1</sup> for 2 min of MilliQ with valve ① closed, and valve ② & ③ open (cross-flow)                                                                                          | Remove the bubbles in the system                          |
| 3   | Permeability                              | - Close valve ① & ③ closed, and open valve ② (dead-end)<br><br>- Run different flow rates (10, 7.5, 5, 2, and 1 mL min <sup>-1</sup> ) for 5 min and collect the pressure data              | Evaluate the membrane permeability before the experiments |
| 4   | Pure water flux                           | Run 10 mL min <sup>-1</sup> (300 L m <sup>-2</sup> h <sup>-1</sup> ) of MilliQ for 40 min and collect the pressure data                                                                     | - Achieve stable flux prior to the experiment             |
| 5   | Preparation of conductivity and pH meters | Put the conductivity and pH in the feed tank and turn them on                                                                                                                               | Monitor the conductivity and pH in the feed solution      |
| 6   | Power supply connection and setting       | - Connect the anode and cathode to the power supply<br><br>- Set the required applied voltage                                                                                               | Apply electric potential on the membrane                  |
| 7   | Setting pump flowrate                     | Set the required pump flowrate                                                                                                                                                              | Drive the influent at a constant flow rate                |
| 8   | Preparation of vials for permeate sample  | Label the sample vials and put under the switching valve for taking samples during the filtration                                                                                           |                                                           |
| 9   | Adsorption                                | - Switch the inlet tube to 1 µg L <sup>-1</sup> SH feed solution<br><br>- Run with power supply off for 500 mL<br><br>- Take a sample of the feed solution before starting adsorption phase | Determine the adsorption of SHs on the EM                 |
| 10  | Electrochemical degradation               | -Power supply is switched on while the working flowrate is still kept<br><br>-The volume of filtered SHs is 500 mL                                                                          | Determine the degradation efficiency of SHs on the EM     |
| 11  | Flushing the system with MilliQ           | Repeat step 1 and 2 with MilliQ                                                                                                                                                             | Remove the residual SH from the system                    |
| 12  | Permeability                              | Repeat step 3 with MilliQ                                                                                                                                                                   | Evaluate the membrane permeability after the experiments  |
| 13  | Lines cleaning                            | Clean each line of the switching valve using MilliQ at 10 mL min <sup>-1</sup> for 5 min                                                                                                    | Clean the lines for sample collections                    |

206

207 **Supplementary Discussion 4. Membrane characterization**

208 **Pure water flux**

209 Pure water flux of the electrochemical CNT membrane was measured over the transmembrane  
210 pressure, as shown in Supplementary Figure 14..

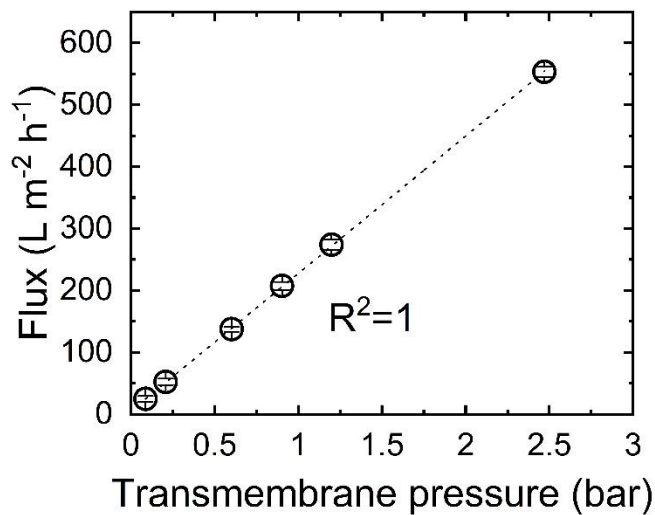

Supplementary Figure 14.  
Pure water flux for the  
fresh electrochemical  
CNT membrane.

211 The pure water flux of the CNT membrane across the transmembrane pressure ranging from 1 to 20  
212 bar demonstrated a perfect linear relationship ( $R^2=1$ ). Error bars represent propagated error from  
213 operational parameter variations and analytical error.

214 Permeability of the membrane was determined to be  $218 \pm 1 \text{ L m}^{-2} \text{ h}^{-1} \cdot \text{bar}$  as the slope of the linear fit  
215 of water flux vs. transmembrane pressure.

216 **Measurement of membrane surface resistivity**

217 The intrinsic resistivity of the CNT membrane was measured using a four-point probe (4PP,  
218 Supplementary Figure 15) <sup>1</sup> with specifics provided in

219 Supplementary Table 2.



Supplementary Figure 15.  
Schematic diagram of a  
collinear four-point probe  
measurement.

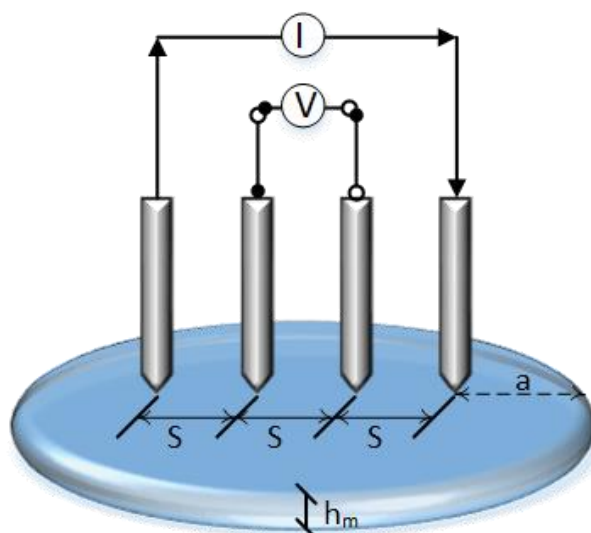

220

221 Supplementary Table 2. Specifications of the four-point probe source meter and probe head.

| Parameter                  | Working value |
|----------------------------|---------------|
| Limit of current           | 1.5 A         |
| Limit of voltage           | 20 V          |
| Spacing between tips, $s$  | 1.016 mm      |
| Pressure on each probe tip | 180 gram      |
| Tip radius                 | 0.254 mm      |

222 In the 4PP measurement, current  $I$  passes between the two outer probes while the resultant voltage  
 223 drop  $V$  is measured across the two inner probes. Separating current injection and voltage  
 224 measurement eliminates the contact resistance because the two probes that detect voltage, draw little  
 225 current<sup>2</sup>. To avoid the edge effects, which referred to disturbances in the electrical field near the edges  
 226 of the material, it was ensured that the distance from any probe to the nearest boundary ( $a$ ) was at  
 227 least five times greater than the probe spacing (1.016 mm)<sup>3</sup>. The resistivity measured by 4PP is  
 228 determined to be  $7.2 \cdot 10^{-4} \Omega \cdot \text{m}$  using Eq. (S1):

$$\rho = \frac{V_c}{I} h_m f \quad (\text{S1})$$

229 where  $I$  (A) is the applied current,  $V_c$  (V) is the detected voltage,  $h_m$  is the thickness of the sample  
 230 ( $2 \cdot 10^{-6} \text{ m}^4$ ), and  $f$  is a geometric factor. Since  $h_m \leq 5s$ ,  $f$  is determined as  $\pi/\ln 2$ <sup>3</sup>.

### 231 Zeta-potential

232 To characterize the surface charge of the CNT membrane as a function of pH, the zeta-potential were  
 233 measured at pH ranging from 2 to 10 in 10 mM NaCl electrolyte solution (Supplementary Figure 16).

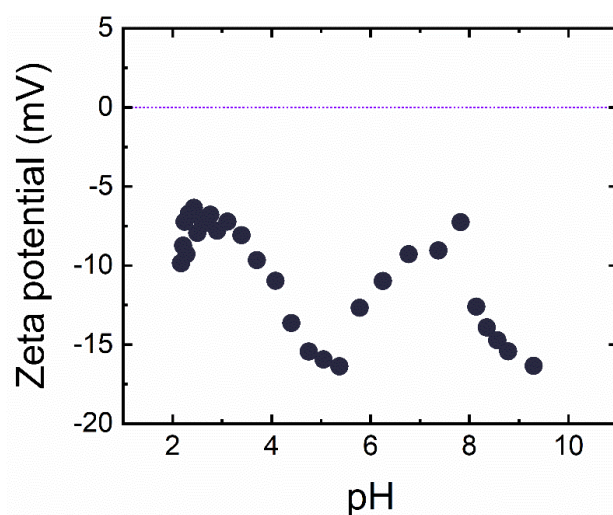

Supplementary Figure 16. Zeta-potential of CNT membranes as a function of pH. 10 mM NaCl electrolyte solution, pH adjustment using 0.05 M HCl and 0.05 M NaOH.

234 The CNT membrane exhibited a negative surface charge from pH 2 to 10, likely attributable to the –  
 235 COOH groups on the surface of the CNTs.

### 236 Three electrode set-up

237 The electrochemical surface potential of the CNT membrane were assessed through an open circuit  
 238 potential measurement in a three-electrode configuration. Supplementary Figure 17 illustrates this  
 239 setup, comprising a CNT membrane as the working electrode, a platinum (Pt) wire as the counter  
 240 electrode, and a Ag/AgCl electrode acting as the reference electrode.

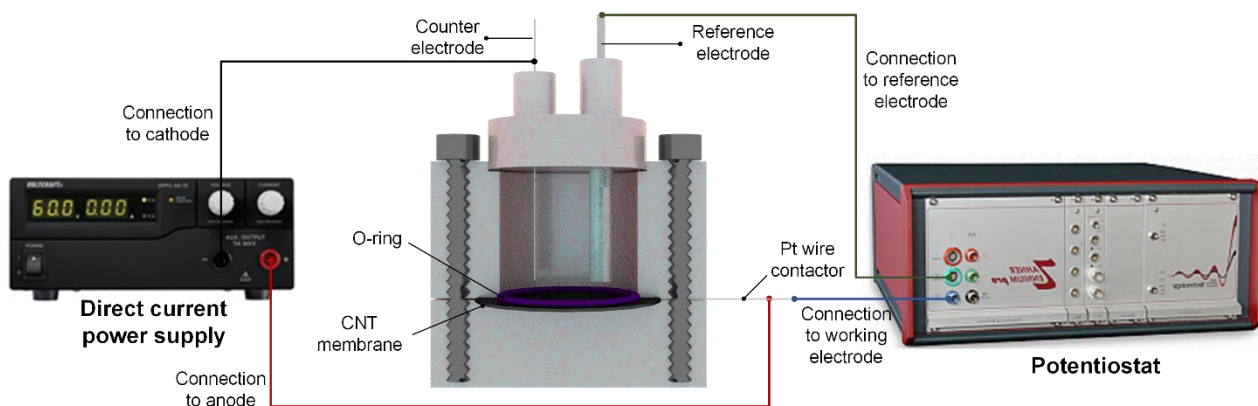

241 Supplementary Figure 17. Three-electrode set-up for membrane surface potential measurement <sup>5</sup>.

### 242 Membrane surface potential at varying cell voltage

243 Supplementary Figure 18. shows the electrochemical surface potential of the CNT membrane  
 244 measured at varying applied cell voltage from 0.6 to 2.5 V.

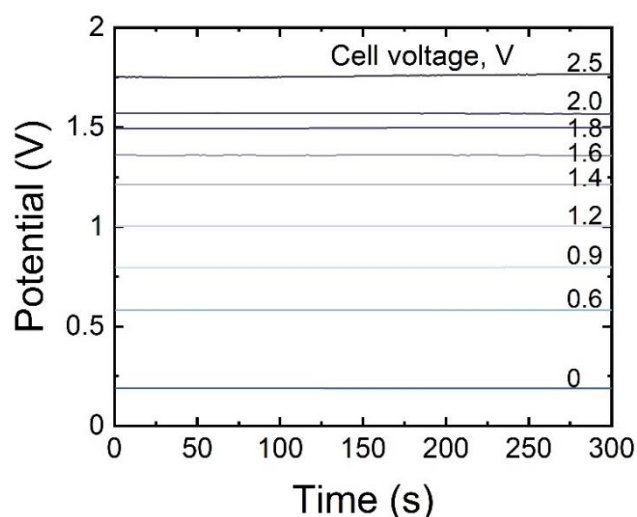

Supplementary Figure 18. Membrane surface potentials vs. Ag/AgCl at varying cell voltage in 10 mM NaCl and 1 mM NaHCO<sub>3</sub>.

245 The surface potentials of the CNT membrane remain stable over time across all cell voltages. The  
 246 surface potential without application of a voltage was determined to be 0.19 V in the electrolyte  
 247 containing 10 mM NaCl and 1 mM NaHCO<sub>3</sub>. In 10 mM NaCl and 1 mM NaHCO<sub>3</sub> electrolyte, the  
 248 CNT membrane exhibited lower surface potentials than the applied cell voltage (ranged from 0.6 to 2.5  
 249 V), primarily due to the Ohmic drop across the electrolyte, electrode materials, and interfaces.

## 250 Supplementary Discussion 5. Characteristics and analytical methods for radiolabeled steroid 251 hormone

### 252 Characteristics of steroid hormone

253 Four SH types, estrone (E1),  $\beta$ -estradiol (E2), progesterone (P), and testosterone (T), were used as  
 254 surrogates micropollutants in aquatic environment in this study, of which the structure and properties  
 255 are summarized in Supplementary Table 3.<sup>6-16</sup>

256 Supplementary Table 3. Chemical structures and selected properties of E1, E2, P, and T<sup>6-16</sup>.

|                                                                  | <b>Estrone (E1)</b>                            | <b>Estradiol (E2)</b>                          | <b>Progesterone (P)</b>                        | <b>Testosterone (T)</b>                        |
|------------------------------------------------------------------|------------------------------------------------|------------------------------------------------|------------------------------------------------|------------------------------------------------|
| Chemical structure                                               |                                                |                                                |                                                |                                                |
| Formula                                                          | C <sub>18</sub> H <sub>22</sub> O <sub>2</sub> | C <sub>18</sub> H <sub>24</sub> O <sub>2</sub> | C <sub>19</sub> H <sub>28</sub> O <sub>2</sub> | C <sub>21</sub> H <sub>30</sub> O <sub>2</sub> |
| Molecular weight (g mol <sup>-1</sup> )                          | 270.4                                          | 272.4                                          | 314.5                                          | 288.4                                          |
| pKa <sup>1</sup>                                                 | 10.3-10.8                                      | 10.2-10.7                                      | -                                              | -                                              |
| Stokes diameter (nm) <sup>2</sup>                                | 0.79-0.82                                      | 0.80                                           | 0.86                                           | 0.82                                           |
| Solubility in H <sub>2</sub> O (g L <sup>-1</sup> ) <sup>3</sup> | 0.80-1.30 (25°C)                               | 0.16-5.00 (25°C)                               | 7.9-16.8 (25°C)                                | 20.0-48.0 (25°C)                               |
| Electron-affinity <sup>4</sup>                                   | -0.42                                          | -0.50                                          | 0.05                                           | 0.12                                           |

<sup>1</sup>Data are adapted from literatures <sup>6-8</sup>. <sup>2</sup>Data are adapted from literatures <sup>9</sup>. <sup>3</sup>Data are adapted from literatures <sup>10-15</sup>. <sup>4</sup>Electron-affinity is a measure of the tendency of a molecule to attract electrons. a compound with high electron affinity is more likely to attract electrons, whereas a compound with low electron affinity would be less likely to attract electrons and thus could be more susceptible to reactions with nucleophiles rather than electrophiles <sup>17-19</sup>. The data are adapted from previous work <sup>16</sup>.

## 257 Elution parameters for UHPLC

258 The UHPLC-FSA analytical method utilized in this study for analyzing SH concentrations was  
 259 adapted from Lyubimenko *et al.* <sup>20</sup>, with a modification in the elution flow rate from 0.25 to 0.2 mL  
 260 min<sup>-1</sup>, and injection volume from 100 to 200 μL to reduce the operating pressure using the same  
 261 instrument. The detailed elution parameters are presented in Supplementary Table 4.

262 Supplementary Table 4. Elution parameters for the UHPLC-FSA analytic procedure.

| Parameters                            | Conditions                                   |
|---------------------------------------|----------------------------------------------|
| Column                                | 150 mm x 2.1 mm, 1.7 μm C18, 100 Å           |
| UHPLC flow rate, mL min <sup>-1</sup> | 0.2                                          |
| Mobile phase                          | MeOH/Water (40/60)                           |
| Mobile phase gradient time, min       | 15                                           |
| Elute gradient                        | Initial MeOH of 40% increase linearly to 80% |
| Injection volume, μL                  | 200                                          |
| Column temperature, °C                | 50                                           |
| Autosampler temperature, °C           | 4                                            |

## 263 Calibration curves for UHPLC and LSC

264 Supplementary Figure 19. presents the calibration curve for E2, performed using a range of E2  
 265 concentrations (0.1 – 100 ng L<sup>-1</sup>) for UHPLC and LSC analyses.

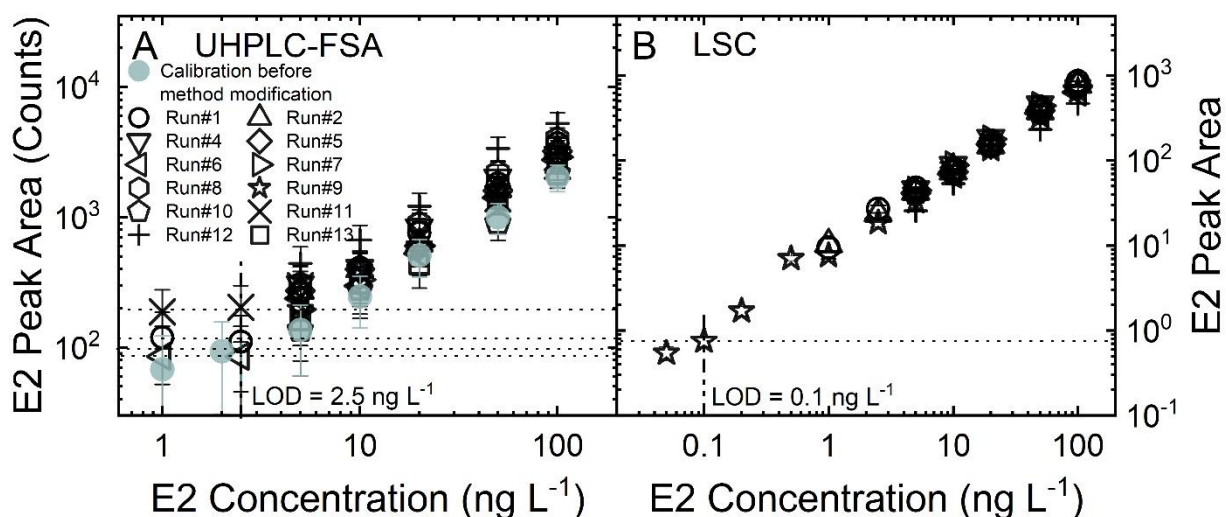

266 Supplementary Figure 19. E2 calibration curve for (A) UHPLC-FSA and (B) LSC in log-scale. The  
 267 data for calibration before method modification was adapted from <sup>21</sup>. Error bars represent  
 268 propagated error from operational parameter variations and analytical error.

269 The UHPLC-FSA demonstrated good linear relationships across the E2 concentration ranging from  
 270 2.5 to 100 ng L<sup>-1</sup>. The UHPLC-FSA achieved a LOD at 2.5 ng L<sup>-1</sup>, maintaining comparability with

271 results prior to the modification of operational parameters. The LSC demonstrated strong linear  
 272 correlations for E2 concentrations spanning from 0.1 to 100 ng L<sup>-1</sup> and a LOD of 0.1 ng L<sup>-1</sup>.

## 273 **Supplementary Discussion 6. Data processing**

### 274 **Membrane performance**

275 Table S5 shows the calculation of electric conductivity ( $\sigma$ , S m<sup>-1</sup>), permeate flow rate ( $Q_p$ , L h<sup>-1</sup>),  
 276 water flux ( $J_w$ , L m<sup>-2</sup> h<sup>-1</sup>), permeability ( $L$ , L m<sup>-2</sup> h<sup>-1</sup> bar), and mean hydraulic residence time ( $t_r$ , h) of  
 277 the CNT layer on the electrochemical membrane.

278 Supplementary Table 5. Calculation parameter and equations.

| Variable                           | Equation                                                                                            | Unit                                  |      |
|------------------------------------|-----------------------------------------------------------------------------------------------------|---------------------------------------|------|
| Electric conductivity ( $\sigma$ ) | $\sigma = \frac{\ln 2I}{\pi V_c h_m}$                                                               | S m <sup>-1</sup>                     | (S2) |
| Permeate flow rate ( $Q_p$ )       | $Q_p = \frac{V_{t2} - V_{t1}}{t2 - t1} = \frac{1000 \cdot (m_{t2} - m_{t1})}{(t2 - t1) \cdot \rho}$ | L h <sup>-1</sup>                     | (S3) |
| Water flux ( $J_w$ )               | $J_w = \frac{Q_p}{A}$                                                                               | L m <sup>-2</sup> h <sup>-1</sup>     | (S4) |
| Permeability ( $L$ )               | $L = \frac{J_w}{\Delta P}$                                                                          | L m <sup>-2</sup> h <sup>-1</sup> bar | (S5) |
| Mean residence time ( $t_r$ )      | $t_r = \frac{V_p}{Q_f} = \frac{h_m \varepsilon}{10^{-3} \cdot J_w}$                                 | h                                     | (S6) |

279 where  $I$  (A) is the applied current,  $V_c$  (V) is the detected cell voltage,  $h_m$  is the thickness of the CNTs  
 280 layer ( $2 \cdot 10^{-6}$  m<sup>4</sup>,<sup>22</sup>). Measurement of a standard indium tin oxide (ITO) film with known sheet  
 281 resistance of 15  $\Omega$  square<sup>-1</sup> showed the error of electric conductivity was within  $\pm 10\%$ .

282  $V_{t2}$  and  $V_{t1}$  (L) were the accumulated volume of the permeate concerted from the permeate mass at  
 283 time  $t2$  and  $t1$  (h). The density of pure water ( $\rho$ ) at the operating temperature of 23 °C ( $997.3$  kg m<sup>-3</sup>  
 284 <sup>23</sup>), was utilized to convert the mass of the permeate ( $m_{t2}$  and  $m_{t1}$ , kg) at  $t2$  and  $t1$  into its  
 285 corresponding volume for all experiments.

286  $A$  is the effective membrane surface area ( $2 \cdot 10^{-2}$  m<sup>2</sup>),  $\Delta P$  is the transmembrane pressure (bar),  $Q_f$  is  
 287 the feed flow rate (L h<sup>-1</sup>).

288  $\varepsilon$  is the porosity of the CNT layer on the membrane support, which is estimated to be 66% from the  
 289 porosity of a similar CNTs membrane<sup>24</sup>.

### 290 **Determination of SHs removal**

291 To reduce potential errors in calculating  $R$ , arising from variations in data points, the experimental  
 292 data of the normalized SH concentration in permeate ( $c_{p,SH}/c_{f,SH}$ ) vs. the accumulated permeate

293 volume ( $V_p$ ) were analysed through a fitting procedure<sup>25</sup>. This process utilized a power model ( $y =$   
 294  $a \cdot x^b$ ) within the  $V_p$  range between 520 and 1000 mL. Subsequently, the  $c_{p,eq}/c_f$  was obtained from  
 295 the curve fitted to the data at  $V_p = 1000$  mL, as depicted in Supplementary Figure 20..

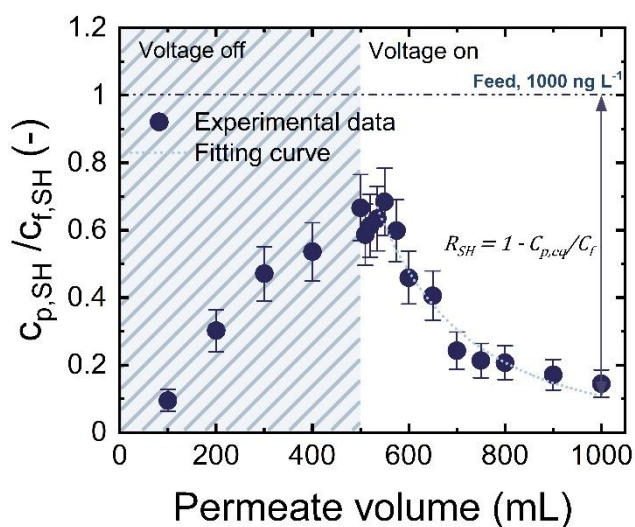

Supplementary Figure 20. Example of determination of SH removal ( $R$ ) by fitting the  $c_{p,SH}/c_f$  data in the range of 550 – 1000 mL of permeate volume. Error bars represent propagated error from operational parameter variations and analytical error.

296

297

### 298 **Determination of the total mass of removed SH with the membrane**

299 To calculate the total mass of SH removed with the EMR over the entire experiment including  
 300 adsorption and degradation phase, the dataset of  $c_p$  against  $V_p$  was analyzed using a polynomial  
 301 fitting model ( $y = A + B \cdot x + C \cdot x^2 + D \cdot x^3$ ) for the adsorption phase and a power model ( $y = a \cdot$   
 302  $x^b$ ) for the degradation phase. The integration of the fitting curve with permeate volume as the  
 303 independent variable, provided the cumulative mass of SH in permeate and the total removal mass of  
 304 SH can be subsequently quantified. An illustrative example of this quantification process for the  
 305 overall mass of removed E2 in the EMR is presented in Supplementary Figure 21..

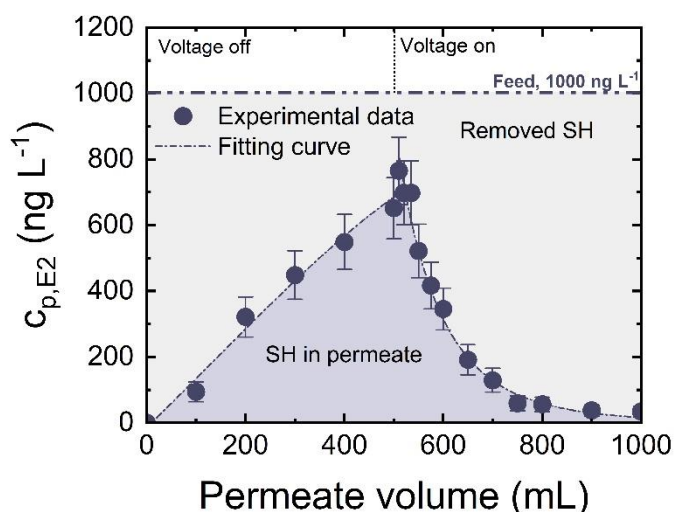

Supplementary Figure 21. Example of determination of total mass of E2 removed within the EMR. Error bars represent propagated error from operational parameter variations and analytical error.

306 In Supplementary Figure 21., the purple-shaded area indicates the accumulative mass of E2 in the  
 307 permeate, while the total mass of E2 removed within the EMR during the 1 L filtration experiment is  
 308 represented by the areas shaded in grey.

### 309 **Determination of the total mass of byproducts**

310 Figure S7 illustrates the quantification of the total mass of byproducts in the permeate. This was  
 311 achieved by fitting the experimental data obtained from UHPLC-FSA and LSC and then integrating  
 312 the resulting curve.

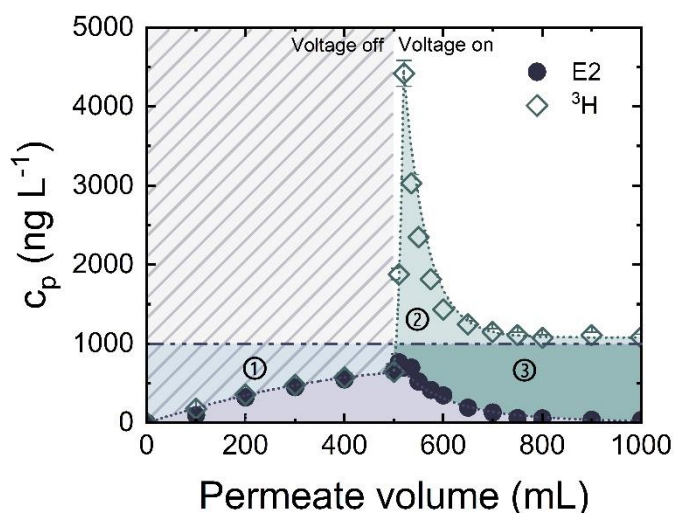

Supplementary Figure 22. Example of determination of total byproducts formed and desorbed from the membrane within the EMR. Error bars represent propagated error from operational parameter variations and analytical error.

313 The area shaded in green represents the cumulative mass of byproducts that formed and were  
 314 desorbed from the membrane throughout the electrochemical degradation process.

### 315 **Determination of the mass of electrochemical adsorbed and degraded SH**

316 To determine the total mass of SH adsorbed on the membrane (under the assumption that all  
 317 byproducts are fully desorbed), the experimental data of the total <sup>3</sup>H activity, as measured by LSC,  
 318 are integrated over the range of permeate volumes (Supplementary Figure 23). The total mass of  
 319 degraded SH is then calculated by subtracting the adsorbed SH from the removed SH.

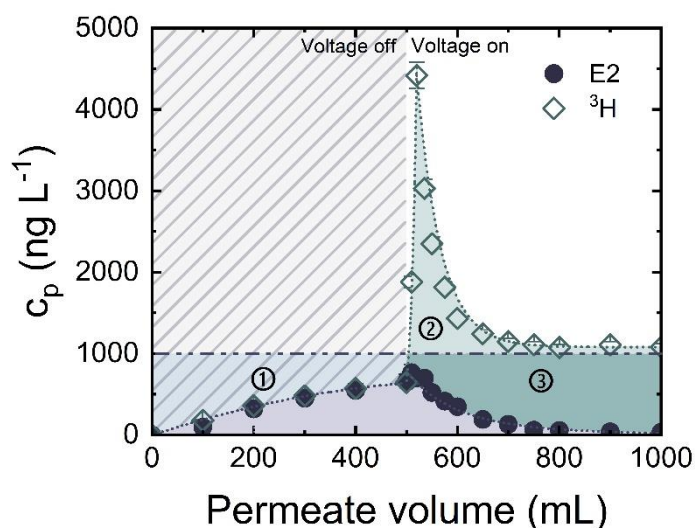

Supplementary Figure 23. Example of determination of the contribution of electrochemical adsorption and degradation. Error bars represent propagated error from operational parameter variations and analytical error.

320 Supplementary Figure 23 illustrates the calculation of the total mass of adsorbed SH, determined as  
 321 the difference between areas ① and ②. Consequently, the mass of degraded SH is quantified by  
 322 subtracting the adsorbed SH (① - ②) from the total removed SH (① + ③). It was observed that the  
 323 total mass of degraded SH is equivalent to the mass of the formed byproducts (② + ③), which arises  
 324 from the assumption that all degradation byproducts are completely desorbed from the membrane.  
 325

### 326 Mass balance analysis for the pre-adsorption experiments

327 As an illustration of the mass balance analysis conducted using the integrated UHPLC-FSA and LSC  
 328 method, the contribution of degraded, adsorbed, and unremoved E2 in the experiments with and  
 329 without pre-adsorption, is shown in Supplementary Figure 24.

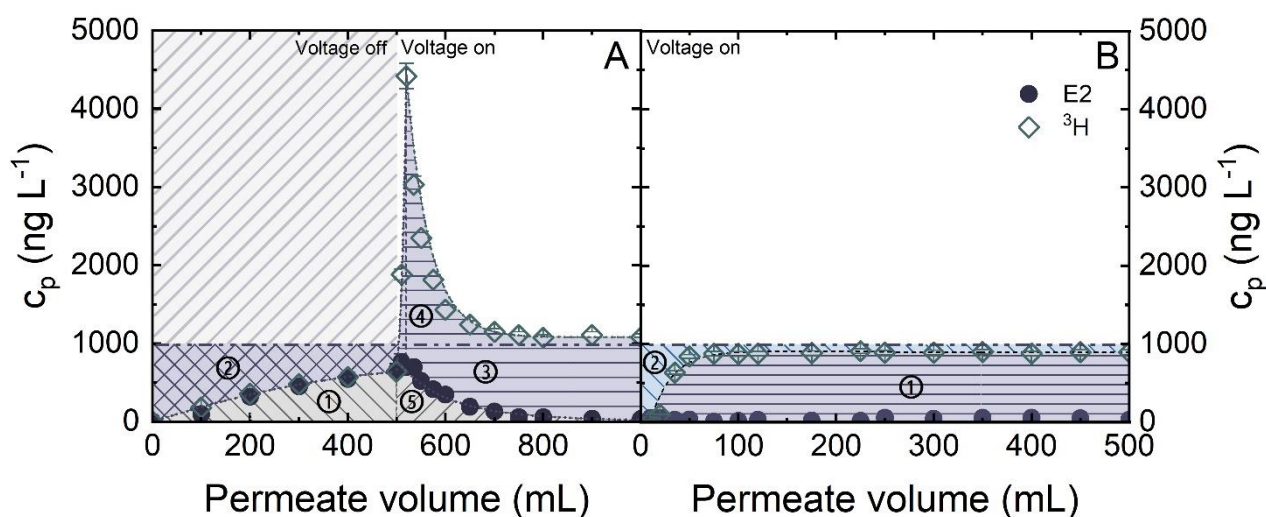

330 Supplementary Figure 24. Illustration of the mass balance analysis of the degraded, adsorbed, and  
 331 unremoved E2 in the experiments with and without pre-adsorption. Error bars represent propagated  
 332 error from operational parameter variations and analytical error.



333 In the pre-adsorption experiment (Supplementary Figure 24A), prior to activating the voltage, 19±4%  
 334 of the initial E2 mass was released into the permeate (unremoved), corresponding to the integrated  
 335 area ① over the volume range of 0-500 mL. Additionally, 31±4% was adsorbed onto the membrane  
 336 (area ②). After activating the voltage, 5±2% of the E2 passed through the system unremoved, as  
 337 determined by the integrated area ⑤ for the 500-1000 mL permeate volume. In total, 61±7% of E2  
 338 was degraded (area ③+④) during the degradation phase (500-1000 mL), while 15±3% remained  
 339 adsorbed on the membrane (area ②-④).

340 In the experiment without pre-adsorption (Supplementary Figure 24B), 77±3% of E2 was degraded  
 341 (area ①) and 22±4% (area ②) was adsorbed onto the membrane, while the remaining 2±2% was  
 342 released into the permeate.

### 343 **Supplementary Discussion 7. Error estimation**

344 In this study, an error propagation method was employed to estimate experimental error, as described  
 345 previously <sup>26</sup>. The following sections provide the detailed method of the error determination  
 346 considering different variabilities, including: i) preparation of feed solutions ( $\Delta_{prep}$ ) due to the  
 347 uncertainties of pipetting and volumetric variations; ii) EMR system caused by the uncertainties of  
 348 its components ( $\Delta S$ ); and the quantification of SH concentration and <sup>3</sup>H activity using the analytical  
 349 tools ( $\Delta_{anal}$ ) - UHPLC-FSA ( $\Delta_{UHPLC}$ ) and LSC ( $\Delta_{LSC}$ ). Supplementary Table 6. summarized the  
 350 sources and their estimated relative errors that contribute to the total the error in research data.

351 Supplementary Table 6. Error sources and their estimated relative errors in the SH concentration  
 352 analysis.

| Parameter                              | Error source                                                                                                     | Justification                                                                                                                                                                                  | Calculation                                                                | Relative error (%) |
|----------------------------------------|------------------------------------------------------------------------------------------------------------------|------------------------------------------------------------------------------------------------------------------------------------------------------------------------------------------------|----------------------------------------------------------------------------|--------------------|
| Sample preparation ( $\Delta_{prep}$ ) | Pipettes ( $\Delta_{pip}$ );<br>Volumetric flasks ( $\Delta_{vol. flasks}$ )                                     | The feed concentration ( $c_p$ ) is variable with the volume of SH stock and MilliQ measured by pipettes and flasks                                                                            | $\Delta_{Prep}$<br>$= \sqrt{\Delta_{pip}^2 + \Delta_{vol. flasks}^2}$      | 4                  |
| Experimental system ( $\Delta S$ )     | Flow rate ( $\Delta Q$ );<br>Electrolyte conductivity ( $\Delta \sigma$ )<br>Cell voltage ( $\Delta_{voltage}$ ) | Flow rate, electrolyte conductivity, and cell voltage affects the SH removal by varying the number of SH molecule to be treated per unit of time, electrolyte resistance, and anodic potential | $\Delta S$<br>$= \sqrt{\Delta Q^2 + \Delta \sigma^2 + \Delta_{voltage}^2}$ | 6                  |

|                                |                                                                                     |                                                                                                                            |       |
|--------------------------------|-------------------------------------------------------------------------------------|----------------------------------------------------------------------------------------------------------------------------|-------|
| UHPLC system ( $\Delta$ UHPLC) | SH concentration in the sample is variable with the resolution of UHPLC             |                                                                                                                            | 1.1   |
| FSA detector ( $\Delta$ FSA)   | $^3\text{H}$ activity in the sample is variable with the error of analysis detector | $\Delta\text{FSA} = 2 \cdot \frac{\sigma_{NC}}{N_{NC}}$                                                                    | 10-16 |
| LSC system ( $\Delta$ LSC)     |                                                                                     | $\sigma_{NC} = \sqrt{\sigma_{TC}^2 + \sigma_{BG}^2}$<br>$\Delta C_{LSC} = 10.536 \cdot c_{LSC \text{ measured}}^{-0.5441}$ | 2-6   |

where:  $\sigma_{NC}$  - standard deviation of net counts,  $N_{NC}$  - net number of counts,  $\sigma_{TC}$  - standard deviation of number of total counts,  $\sigma_{BG}$  - standard deviation of background counts,  $c_{LSC \text{ measured}}$  is the permeate concentration measured by LSC

353 The relative error for each system parameter was determined with the data acquired by different  
354 sensors using the following equations:

$$\Delta y_{abs} = \frac{y_{max} - y_{min}}{2} \quad (S7)$$

$$\Delta y_{rel} = \frac{\Delta y_{abs}}{\bar{y}} \quad (S8)$$

355 where  $\Delta y_{abs}$  is the absolute error of the system parameter  $y$ ,  $y_{max}$  and  $y_{min}$  are the maximum and  
356 minimum values of  $y$ , respectively for sufficient repeats,  $\Delta y_{rel}$  is the relative error, and  $\bar{y}$  is the mean  
357 value. The approaches described in previous work were employed for the error propagation of  
358 analytic tools, UHPLC-FSA<sup>20</sup> and LSC<sup>27</sup>.

### 359 **Error analysis of SH concentration, $^3\text{H}$ activity, normalized concentration and removal**

360 The total relative error of the SH concentration and  $^3\text{H}$  activity ( $\Delta E$ ) quantified through HPLC-FSA  
361 and LSC was estimated using Eq. (S9).

$$\Delta E = \sqrt{\Delta\text{Prep}^2 + \Delta S^2 + \Delta\text{anal}^2} \quad (S9)$$

362 To make this calculation clear, as an example, the errors for feed concentrations measured using  
363 UHPLC-FSA and LSC in variation of sample preparation (4%) and analytical method (1.1% for  
364 UHPLC, 10-16% for FSA, and 2-6% for LSC) are reported (Supplementary Figure 25.). The errors  
365 of feed concentrations analyzed with UHPLC-FSA were determined to be  $\pm 11-17\%$ , and those  
366 measured through LSC were estimated to be  $\pm 4-7\%$  using Eq (S9).

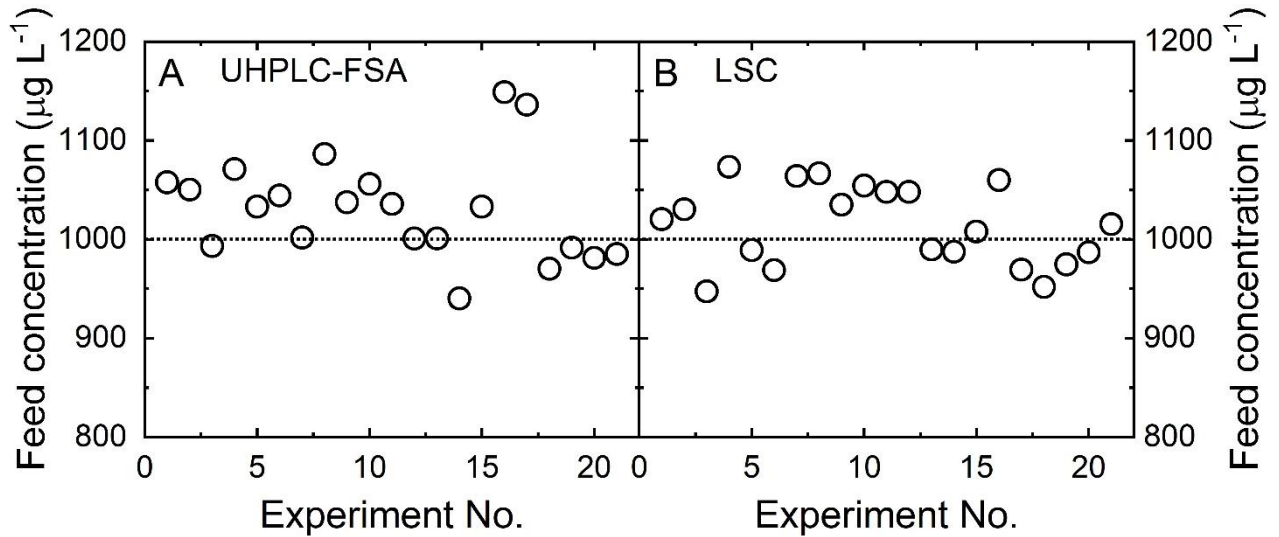

367 Supplementary Figure 25. Feed concentrations measured using UHPLC-FSA and LSC for the  
 368 electrochemical filtration experiments.

369 Supplementary Figure 25. showed that the feed concentrations measured by UHPLC-FSA ranged  
 370 from 940 to 1149  $\mu\text{g L}^{-1}$ , while those measured by LSC varied between 947 and 1073  $\mu\text{g L}^{-1}$ . The  
 371 errors associated with these measurements fall within the range calculated using the error propagation  
 372 method.

373 The relative error of normalized SH concentration and  $^3\text{H}$  activity in the permeate ( $\Delta c_p/c_f$ ) is directly  
 374 related to the error of  $c_p$  and  $c_f$ , which is determined using the equation:

$$\Delta(c_p/c_f) = \frac{c_p}{c_f} \cdot \sqrt{\Delta c_f^2 + \Delta c_p^2} = \frac{c_p}{c_f} \cdot \sqrt{(\Delta \text{Prep}^2 + \Delta \text{anal}^2) + \Delta E^2} \quad (\text{S10})$$

375 Correspondingly, the relative error of removal ( $R = 100 \cdot (1 - c_p/c_f)$ ) is calculated *via* the equation:

$$\Delta R = \frac{c_p}{c_f} \cdot \Delta(c_p/c_f) \quad (\text{S11})$$

### 376 Error analysis of total mass of removed SH and rate of SH removal

377 According to the calculation of total mass removal either by adsorption or degradation (Eq. (S12)),  
 378 error of the total mass removal ( $\Delta m_{rem}$ ) is determined by the error of  $c_f$  and the accumulative SH  
 379 mass in the permeate ( $m_p$ ). The absolute error of  $m_p$  ( $\Delta m_{p,abs}$ ) was calculated by fitting the data of  
 380  $c_p + \Delta c_{p,abs}$  and  $c_p - \Delta c_{p,abs}$ , and then the  $\Delta m_{p,abs}$  can be determined by integrating the fitting  
 381 curves (Supplementary Figure 26.).

$$m_{rem} = m_f - \sum_{i=1}^n m_{p,i} \quad (\text{S12})$$

382 where  $V_{p,i}$  and  $c_{p,i}$  are the volume and concentration of the permeate sample  $i$ ,  $n$  is the total number  
 383 of the permeate samples.

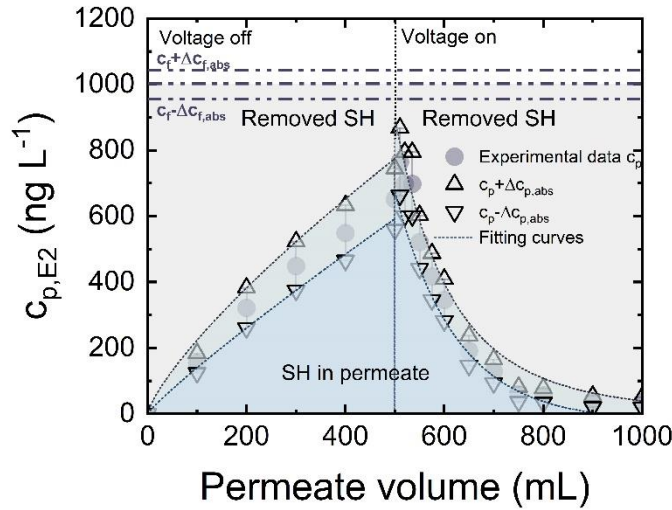

Supplementary Figure 26. Example of determination of the absolute error of total SH mass in the permeate. Error bars represent propagated error from operational parameter variations and analytical error.

384 The  $\Delta m_{p,abs}$  was determined by half the difference in the integrated area under the fitting curve for  
 385  $c_p + \Delta c_{p,abs}$  and  $c_p - \Delta c_{p,abs}$ , presented by half the green area in Supplementary Figure 26.. Thus,  
 386 the absolute error for the removed SH ( $\Delta m_{rem,abs}$ ) can be calculated using the equation below.

$$\begin{aligned} \Delta m_{rem,abs} &= \frac{m_{rem,max} - m_{rem,min}}{2} \\ &= \frac{\{(c_f + \Delta c_{f,abs}) - (c_p - \Delta c_{p,abs})\} - \{(c_f - \Delta c_{f,abs}) - (c_p + \Delta c_{p,abs})\}}{2} \end{aligned} \quad (S13)$$

387 According to the definition of the apparent rate of SH removal ( $r'_{rem} = \frac{m_{rem}}{t \cdot M \cdot A}$ ), the relative error of  
 388  $r'_{rem}$  ( $\Delta r'_{rem}$ ) was directly determined by the  $\Delta m_{rem}$ , which can be calculated using:

$$\Delta r'_{rem} = \Delta m_{rem} = \frac{\Delta m_{rem,abs}}{m_{rem}} \quad (S14)$$

### 389 Supplementary References

- 390 1. PAUW L.J.v.d., A method of measuring specific resistivity and Hall effect of discs of arbitrary shape,  
 391 *Philips Research Reports* **13**, 1-9 (1958).  
 392 2. Kim J.-K., Zhang Y., Lee D.-W., A smart microfour-point probe with ultrasharp in-plane tips, *Review of*  
 393 *Scientific Instruments* **80**, 045107 (2009).  
 394 3. Lu Y., Santino L.M., Acharya S., Anandarajah H., D'Arcy J.M., Studying electrical conductivity using a  
 395 3D printed four-point probe station, *Journal of Chemical Education* **94**, 950-955 (2017).  
 396 4. Zhu X., Dudchenko A.V., Khor C.M., He X., Ramon G.Z., Jassby D., Field-induced redistribution of  
 397 surfactants at the oil/water interface reduces membrane fouling on electrically conducting carbon nanotube UF  
 398 membranes, *Environmental Science & Technology* **52**, 11591-11600 (2018).  
 399 5. Plate material evaluating cell, Teflon. ALS, Japan. <https://www.als-japan.com/1127.html>. Access date:  
 400 19/07/2024.  
 401 6. Perrin D.D., Dempsey B., Serjeant E.P., *pKa prediction for organic acids and bases*, Chapman and Hall,  
 402 London ; New York, (1981).  
 403 7. Lewis K.M., Archer R.D., pKa values of estrone, 17 $\beta$ -estradiol and 2-methoxyestrone, *Steroids* **34**, 485-499  
 404 (1979).  
 405 8. Bhandari A., Surampalli R.Y., Adams C.D., Champagne P., Ong S.K., Tyagi R.D., Zhang T.C.,  
 406 *Contaminants of emerging environmental concern*, American Society of Civil Engineers, Reston, Virginia,  
 407 USA, (2009).  
 408 9. Worch E., Eine neue gleichung zur berechnung von diffusionskoeffizienten gelöster stoffe, *Vom Wasser* **81**,  
 409 289-297 (1993).

- 410 10. Shareef A., Angove M.J., Wells J.D., Johnson B.B., Aqueous solubilities of estrone, 17 $\beta$ -estradiol, 17 $\alpha$ -  
411 ethynylestradiol, and bisphenol A, *Journal of Chemical & Engineering Data* **51**, 879-881 (2006).
- 412 11. Bischoff F., Pilhorn H.R., The state and distribution of steroid hormones in biologic system: III. Solubilities  
413 of testosterone, progesterone, and  $\alpha$ -estradiol in aqueous salt and protein solution and in serum, *Journal of*  
414 *Biological Chemistry* **174**, 663-682 (1948).
- 415 12. Kabasakalian P., Britt E., Yudis M.D., Solubility of some steroids in water, *Journal of Pharmaceutical*  
416 *Sciences* **55**, 642 (1966).
- 417 13. Haskins A.L., Solubility of progesterone in water and in saline, *Proceedings of the Society for Experimental*  
418 *Biology and Medicine* **70**, 228-229 (1949).
- 419 14. Lange W.E., Amundson M.E., Soluble steroids I: Sugar derivatives, *Journal of Pharmaceutical Sciences*  
420 **51**, 1102-1106 (1962).
- 421 15. Lata G.F., Dac L.K., Steroid solubility studies with aqueous solutions of urea and ureides, *Archives of*  
422 *Biochemistry and Biophysics* **109**, 434-441 (1965).
- 423 16. Sudhakaran S., Calvin J., Amy G.L., QSAR models for the removal of organic micropollutants in four  
424 different river water matrices, *Chemosphere* **87**, 144-150 (2012).
- 425 17. Liu G., Zhang T., Wang T., Yamashita H., Zhao Y., Qian X., Peroxydisulfate activation by photo-generated  
426 charges on mesoporous carbon nitride for removal of chlorophenols, *Applied Catalysis B: Environmental* **296**,  
427 120370 (2021).
- 428 18. Foote C.S., Peters J.W., Chemistry of singlet oxygen. XIV. Reactive intermediate in sulfide photooxidation,  
429 *Journal of the American Chemical Society* **93**, 3795-3796 (1971).
- 430 19. DeRosa M.C., Crutchley R.J., Photosensitized singlet oxygen and its applications, *Coordination Chemistry*  
431 *Reviews* **233-234**, 351-371 (2002).
- 432 20. Lyubimenko R., Richards B.S., Turshatov A., Schäfer A.I., Separation and degradation detection of  
433 nanogram-per-litre concentrations of radiolabelled steroid hormones using combined liquid chromatography  
434 and flow scintillation analysis, *Scientific Reports* **10**, 7095 (2020).
- 435 21. Liu S., Edara P.C., Schäfer A.I., Influence of organic matter on the photocatalytic degradation of steroid  
436 hormones by TiO<sub>2</sub>-coated polyethersulfone microfiltration membrane, *Water Research* **245**, 120438 (2023).
- 437 22. Duan W., Ronen A., Walker S., Jassby D., Polyaniline-coated carbon nanotube ultrafiltration membranes:  
438 Enhanced anodic stability for in situ cleaning and electro-oxidation processes, *ACS Applied Materials &*  
439 *Interfaces* **8**, 22574-22584 (2016).
- 440 23. Kell G.S., Density, thermal expansivity, and compressibility of liquid water from 0. deg. to 150. deg..  
441 Correlations and tables for atmospheric pressure and saturation reviewed and expressed on 1968 temperature  
442 scale, *Journal of Chemical and Engineering data* **20**, 97-105 (1975).
- 443 24. Dudchenko A.V., Rolf J., Russell K., Duan W., Jassby D., Organic fouling inhibition on electrically  
444 conducting carbon nanotube-polyvinyl alcohol composite ultrafiltration membranes, *Journal of Membrane*  
445 *Science* **468**, 1-10 (2014).
- 446 25. Lotfi S., Fischer K., Schulze A., Schäfer A.I., Photocatalytic degradation of steroid hormone  
447 micropollutants by TiO<sub>2</sub>-coated polyethersulfone membranes in a continuous flow-through process, *Nature*  
448 *Nanotechnology* **17**, 417-423 (2022).
- 449 26. Imbrogno A., Nguyen M.N., Schäfer A.I., Tutorial review of error evaluation in experimental water  
450 research at the example of membrane filtration, *Chemosphere*, 141833 (2024).
- 451 27. Allouzi M., Imbrogno A., Schäfer A.I., Energy barriers for steroid hormone transport in nanofiltration,  
452 *Environmental Science & Technology*, (2022).

453
